# Supplementary material for: dsRNA Molecules From the Tobacco Mosaic Virus p126 Gene Counteract TMV-Induced Proteome Changes at an Early Stage of Infection
Source: Front Plant Sci. 2021 May 13;12:663707. doi: 10.3389/fpls.2021.663707 (PMC8155517; doi:10.3389/fpls.2021.663707)
Supplement: Supplementary Table 6 — Next generation sequencing (NGS) data showing the production of siRNAs in the dsRNAp126 + TMV treatment at 15 min post inoculation (mpi). [file Table_6.xlsx]

## Sheet: Φύλλο1
	TABLE S6 | Next generation sequencing (NGS) data showing the production of siRNAs in the dsRNAp126+TMV treatment at 15 minutes post inoculation (mpi). Depicted are the read counts of produced siRNAs (20-25 nt) at each position of the TMV genome (NC_001367.1). The sense strand siRNAs columns contain the read counts of sense strand siRNAs which start at a given position of the TMV genome. The antis…
		Size of siRNAs (sense [s])						Size of siRNAs (antisense [as])
	position in TMV genome	20_s	21_s	22_s	23_s	24_s	25_s	20_as	21_as	22_as	23_as	24_as	25_as	total sense	total antisense	total
	1	0	0	0	0	0	0	0	0	0	0	0	0	0	0	0
	2	0	0	0	0	0	0	0	0	0	0	0	0	0	0	0
	3	0	0	0	0	0	0	1	0	0	0	0	0	0	1	1
	4	0	0	0	0	0	0	0	0	2	0	0	0	0	2	2
	5	0	0	0	0	0	0	0	1	0	0	0	0	0	1	1
	6	0	0	0	0	0	0	0	0	1	0	0	1	0	2	2
	7	0	0	0	0	0	0	0	0	0	0	0	0	0	0	0
	8	0	0	0	0	0	0	1	0	0	0	0	0	0	1	1
	9	0	0	0	0	0	0	0	0	0	0	0	0	0	0	0
	10	0	0	0	0	0	0	0	0	0	0	0	0	0	0	0
	11	0	0	0	0	0	0	1	0	2	0	1	0	0	4	4
	12	0	0	0	0	0	0	0	0	0	0	0	0	0	0	0
	13	0	0	0	0	0	0	0	0	0	0	0	0	0	0	0
	14	0	0	0	0	0	0	0	2	0	0	0	0	0	2	2
	15	0	0	0	0	0	0	0	0	0	0	0	0	0	0	0
	16	0	0	0	0	0	0	0	0	0	0	0	0	0	0	0
	17	0	0	0	0	0	0	0	1	2	0	0	0	0	3	3
	18	0	0	0	0	0	0	1	1	0	0	0	0	0	2	2
	19	0	0	0	0	0	0	0	1	0	0	0	0	0	1	1
	20	0	0	0	0	0	0	0	3	3	0	0	0	0	6	6
	21	0	0	0	0	0	0	0	1	8	0	0	0	0	9	9
	22	0	0	0	0	0	0	0	5	0	3	0	0	0	8	8
	23	0	0	0	0	0	0	0	0	3	0	0	0	0	3	3
	24	0	0	0	0	0	0	0	7	3	0	0	0	0	10	10
	25	0	0	0	0	0	0	0	1	0	0	0	0	0	1	1
	26	0	0	0	0	0	0	1	0	2	0	0	0	0	3	3
	27	0	0	0	0	0	0	1	0	1	0	0	0	0	2	2
	28	0	0	0	0	0	0	0	0	0	0	0	0	0	0	0
	29	0	0	0	0	0	0	0	0	1	0	0	0	0	1	1
	30	0	0	0	0	0	0	0	1	0	1	0	0	0	2	2
	31	0	0	0	0	0	0	0	1	0	0	0	0	0	1	1
	32	0	0	0	0	0	0	0	0	3	0	0	0	0	3	3
	33	0	0	0	0	0	0	0	2	0	0	0	0	0	2	2
	34	0	0	0	0	0	0	0	0	0	0	0	0	0	0	0
	35	0	0	0	0	0	0	0	0	1	0	0	0	0	1	1
	36	0	0	0	0	0	0	0	0	0	0	0	0	0	0	0
	37	0	0	0	0	0	0	0	0	0	0	0	0	0	0	0
	38	0	0	0	0	0	0	1	1	0	0	0	0	0	2	2
	39	0	0	0	0	0	0	0	0	0	0	0	0	0	0	0
	40	0	0	0	0	0	0	0	0	0	0	0	0	0	0	0
	41	0	0	0	0	0	0	0	0	0	0	0	0	0	0	0
	42	0	0	0	0	0	0	0	0	0	0	0	0	0	0	0
	43	0	0	0	0	0	0	0	0	1	0	0	0	0	1	1
	44	0	0	0	0	0	0	0	1	1	0	0	0	0	2	2
	45	0	1	0	0	1	0	0	0	0	0	0	0	2	0	2
	46	0	0	0	0	0	0	0	0	0	0	0	0	0	0	0
	47	0	0	0	0	0	0	0	0	0	0	0	0	0	0	0
	48	0	0	0	0	0	0	0	0	0	0	0	0	0	0	0
	49	0	0	0	0	0	0	0	0	0	0	0	0	0	0	0
	50	0	0	0	0	0	0	0	0	0	0	0	0	0	0	0
	51	0	0	0	0	0	0	0	0	0	0	0	0	0	0	0
	52	0	0	1	0	0	0	0	0	0	0	0	0	1	0	1
	53	0	0	0	0	0	0	0	0	0	2	0	0	0	2	2
	54	0	0	0	1	0	0	0	0	1	0	0	0	1	1	2
	55	0	0	0	0	0	0	0	0	0	0	0	0	0	0	0
	56	0	1	0	0	0	0	0	0	0	0	0	0	1	0	1
	57	0	0	0	0	0	0	0	0	0	0	0	0	0	0	0
	58	0	0	0	0	0	0	0	0	0	0	0	0	0	0	0
	59	0	0	0	0	0	0	0	0	1	0	0	0	0	1	1
	60	0	0	0	0	0	0	0	0	0	0	0	0	0	0	0
	61	0	0	0	0	0	0	0	0	0	0	0	0	0	0	0
	62	0	0	0	0	0	0	0	0	0	0	0	0	0	0	0
	63	0	1	0	0	0	0	0	0	1	0	1	0	1	2	3
	64	0	0	0	0	1	0	1	0	1	0	0	0	1	2	3
	65	0	0	0	0	0	0	0	0	0	0	0	0	0	0	0
	66	0	0	1	0	0	0	0	0	2	0	0	0	1	2	3
	67	0	0	1	0	0	0	0	0	0	0	0	0	1	0	1
	68	0	0	0	0	0	0	0	1	0	0	0	0	0	1	1
	69	0	0	0	0	0	0	0	0	0	0	0	0	0	0	0
	70	0	0	0	0	0	0	1	0	1	0	0	0	0	2	2
	71	0	0	0	0	0	0	0	3	0	0	0	0	0	3	3
	72	0	1	0	0	0	0	0	0	0	0	0	0	1	0	1
	73	0	0	0	0	0	0	0	0	2	0	0	0	0	2	2
	74	0	0	1	0	0	0	0	0	0	0	0	0	1	0	1
	75	0	0	0	0	0	0	1	1	0	0	0	0	0	2	2
	76	0	0	0	0	0	0	1	0	1	0	0	0	0	2	2
	77	0	0	0	0	0	0	0	0	0	0	0	0	0	0	0
	78	0	0	0	0	0	0	0	0	0	0	0	0	0	0	0
	79	0	0	0	0	0	0	0	0	0	0	0	0	0	0	0
	80	0	0	0	0	0	0	4	1	0	0	0	0	0	5	5
	81	0	0	0	0	0	0	0	0	0	0	0	0	0	0	0
	82	0	0	0	0	0	0	0	0	0	0	0	0	0	0	0
	83	0	0	0	0	0	0	1	0	3	0	0	0	0	4	4
	84	0	0	0	0	0	0	0	0	0	0	0	0	0	0	0
	85	0	0	0	0	0	0	0	0	1	0	0	0	0	1	1
	86	0	0	0	0	0	0	0	0	2	0	0	0	0	2	2
	87	0	1	0	0	0	0	4	2	2	0	0	0	1	8	9
	88	0	0	0	0	0	0	0	0	0	0	0	0	0	0	0
	89	0	0	12	0	0	0	0	0	0	0	0	0	12	0	12
	90	0	6	0	0	0	1	0	0	0	0	0	0	7	0	7
	91	0	0	0	0	0	0	0	0	0	0	0	0	0	0	0
	92	0	0	0	0	0	0	0	0	0	0	0	0	0	0	0
	93	0	0	0	0	0	0	0	0	0	0	0	0	0	0	0
	94	0	0	0	0	0	0	0	0	0	0	0	0	0	0	0
	95	0	0	0	0	0	0	0	0	0	0	0	0	0	0	0
	96	0	0	0	0	0	0	0	0	0	0	0	0	0	0	0
	97	0	0	0	0	0	0	0	0	1	0	0	0	0	1	1
	98	0	0	0	0	1	0	0	0	2	0	0	0	1	2	3
	99	0	0	1	0	2	1	0	0	2	0	0	0	4	2	6
	100	0	0	5	0	0	0	0	0	0	0	0	0	5	0	5
	101	0	0	0	0	0	0	0	0	0	0	0	0	0	0	0
	102	0	0	0	0	0	0	0	0	0	0	0	0	0	0	0
	103	0	0	0	0	0	0	0	1	0	0	0	0	0	1	1
	104	0	1	0	0	0	0	0	1	2	0	0	0	1	3	4
	105	0	0	0	0	0	0	0	0	2	0	0	0	0	2	2
	106	0	0	0	0	0	0	0	0	1	0	0	0	0	1	1
	107	0	0	0	0	0	0	1	0	0	0	0	0	0	1	1
	108	0	0	0	0	0	0	0	1	4	0	0	0	0	5	5
	109	1	2	66	0	0	0	0	0	0	0	0	0	69	0	69
	110	5	62	33	0	1	0	1	0	0	0	0	0	101	1	102
	111	3	2	1	0	0	0	1	0	1	0	0	0	6	2	8
	112	0	0	1	0	0	0	0	0	0	0	0	0	1	0	1
	113	0	0	0	0	0	0	2	1	2	0	0	0	0	5	5
	114	0	0	0	0	0	0	0	1	2	0	0	0	0	3	3
	115	0	0	0	0	0	0	0	0	0	0	0	0	0	0	0
	116	0	0	0	0	0	0	0	0	0	0	0	0	0	0	0
	117	0	0	0	0	0	0	0	0	0	0	0	0	0	0	0
	118	0	0	0	0	0	0	0	0	0	0	0	0	0	0	0
	119	0	0	0	0	0	0	0	0	0	0	0	0	0	0	0
	120	0	0	0	0	0	0	0	0	0	0	0	0	0	0	0
	121	0	0	0	0	0	0	0	0	0	0	0	0	0	0	0
	122	0	0	0	0	0	0	0	0	0	0	0	0	0	0	0
	123	0	0	0	0	0	0	0	4	1	0	0	0	0	5	5
	124	0	0	0	0	0	0	0	0	0	0	0	0	0	0	0
	125	0	0	0	0	0	0	0	1	0	0	0	0	0	1	1
	126	0	0	1	0	0	0	0	0	1	0	0	0	1	1	2
	127	0	0	0	0	0	0	0	1	1	0	0	0	0	2	2
	128	0	0	0	0	0	0	0	2	2	0	0	0	0	4	4
	129	0	0	0	0	0	0	1	0	0	0	0	0	0	1	1
	130	0	0	0	0	0	0	0	4	2	0	0	0	0	6	6
	131	0	0	1	0	0	0	0	1	6	0	0	0	1	7	8
	132	0	0	0	0	0	0	0	0	0	0	1	0	0	1	1
	133	0	0	0	0	0	0	0	0	0	0	0	0	0	0	0
	134	0	0	0	0	0	0	0	7	0	0	0	0	0	7	7
	135	0	0	2	0	0	0	0	0	0	0	0	0	2	0	2
	136	0	4	0	0	0	0	0	0	0	0	0	0	4	0	4
	137	1	0	5	0	0	0	1	6	2	0	0	0	6	9	15
	138	0	0	3	0	2	0	0	0	0	0	0	0	5	0	5
	139	0	2	6	1	0	0	0	0	0	0	0	0	9	0	9
	140	0	11	0	0	0	0	0	0	0	0	0	0	11	0	11
	141	2	10	0	0	0	0	0	1	0	2	0	0	12	3	15
	142	4	4	4	3	0	0	0	1	0	0	0	0	15	1	16
	143	0	7	10	0	0	0	0	1	0	0	0	0	17	1	18
	144	0	5	2	1	0	0	0	0	0	0	0	0	8	0	8
	145	0	1	0	0	0	0	0	0	1	0	0	0	1	1	2
	146	0	0	0	0	0	0	0	0	0	0	0	0	0	0	0
	147	1	0	1	0	0	0	0	0	0	0	0	0	2	0	2
	148	0	2	0	0	0	0	0	0	0	0	0	0	2	0	2
	149	0	0	0	0	0	0	0	0	0	0	0	0	0	0	0
	150	0	0	0	0	0	0	0	0	0	0	0	0	0	0	0
	151	0	0	0	0	0	0	0	0	0	0	0	0	0	0	0
	152	0	0	0	0	0	0	0	0	0	0	0	0	0	0	0
	153	0	0	0	0	0	0	0	1	13	0	1	0	0	15	15
	154	0	0	0	0	0	0	0	1	0	0	0	0	0	1	1
	155	0	0	0	0	0	0	0	1	0	0	0	0	0	1	1
	156	0	0	0	0	0	0	1	8	12	0	1	0	0	22	22
	157	0	0	0	0	0	0	0	1	1	0	0	0	0	2	2
	158	1	0	0	0	0	0	0	0	0	0	0	0	1	0	1
	159	1	0	0	0	0	0	0	1	0	0	0	0	1	1	2
	160	0	0	1	0	0	0	0	0	0	0	0	0	1	0	1
	161	0	0	0	0	0	0	0	0	0	0	0	0	0	0	0
	162	0	0	0	0	0	0	0	0	0	0	0	0	0	0	0
	163	0	0	0	0	0	0	10	9	8	0	0	0	0	27	27
	164	0	3	0	0	0	0	0	0	0	0	1	0	3	1	4
	165	0	0	0	0	0	0	0	0	0	0	0	0	0	0	0
	166	0	0	0	0	0	0	0	0	0	0	0	0	0	0	0
	167	0	0	4	0	0	0	0	0	1	0	0	0	4	1	5
	168	0	3	0	0	0	0	0	0	0	0	0	0	3	0	3
	169	0	0	1	0	0	0	1	1	0	0	0	0	1	2	3
	170	0	0	0	0	0	0	1	1	0	0	0	0	0	2	2
	171	0	0	0	0	0	0	0	0	0	0	0	0	0	0	0
	172	0	1	0	0	0	0	0	0	0	0	0	2	1	2	3
	173	0	0	0	0	0	1	0	2	0	0	0	0	1	2	3
	174	0	0	1	0	0	0	0	0	1	0	0	0	1	1	2
	175	0	0	0	0	0	0	0	0	0	0	0	0	0	0	0
	176	0	0	0	0	0	0	0	0	0	0	0	0	0	0	0
	177	0	0	0	1	0	0	0	0	0	1	0	0	1	1	2
	178	0	0	0	0	0	0	0	0	1	0	0	0	0	1	1
	179	0	0	1	0	0	0	0	0	0	0	0	0	1	0	1
	180	0	0	0	0	0	0	1	0	3	0	0	0	0	4	4
	181	0	0	0	0	0	0	0	3	2	0	0	0	0	5	5
	182	0	0	0	0	1	1	0	0	1	0	0	0	2	1	3
	183	1	1	2	0	3	0	1	0	0	0	0	0	7	1	8
	184	0	2	6	6	0	0	0	0	0	0	0	0	14	0	14
	185	0	9	15	0	0	0	0	0	0	0	0	0	24	0	24
	186	0	1	0	0	0	0	0	0	0	0	0	0	1	0	1
	187	1	0	0	0	1	0	0	0	0	0	0	0	2	0	2
	188	0	0	0	0	0	0	0	0	0	0	0	0	0	0	0
	189	0	0	0	0	0	0	0	0	0	0	0	0	0	0	0
	190	0	0	0	0	0	0	0	1	0	1	0	0	0	2	2
	191	0	0	0	0	0	0	0	0	1	0	0	0	0	1	1
	192	0	0	0	0	0	0	0	1	2	0	0	0	0	3	3
	193	0	0	0	0	0	0	0	0	1	0	0	0	0	1	1
	194	0	0	0	0	0	0	0	0	0	0	0	0	0	0	0
	195	0	0	0	0	1	0	1	0	0	0	0	0	1	1	2
	196	0	0	0	0	0	0	0	0	0	0	0	0	0	0	0
	197	0	7	13	0	0	0	0	0	0	0	0	0	20	0	20
	198	2	3	11	0	0	0	0	0	0	0	0	0	16	0	16
	199	0	0	2	0	0	0	0	1	0	0	0	0	2	1	3
	200	0	13	0	0	0	0	0	1	0	0	0	0	13	1	14
	201	2	0	0	0	0	0	0	3	5	0	0	0	2	8	10
	202	0	0	0	0	0	0	0	4	10	0	0	0	0	14	14
	203	0	0	0	0	0	0	0	1	0	0	0	0	0	1	1
	204	0	1	0	0	0	0	0	0	0	0	0	0	1	0	1
	205	0	0	0	0	0	0	0	0	0	0	0	0	0	0	0
	206	0	0	0	0	0	0	0	0	0	0	0	0	0	0	0
	207	0	0	0	0	0	0	0	0	0	0	0	0	0	0	0
	208	0	0	0	0	0	0	0	0	0	0	0	0	0	0	0
	209	0	0	0	0	0	0	0	0	0	0	0	0	0	0	0
	210	0	0	0	0	0	0	0	0	0	0	0	0	0	0	0
	211	0	0	0	0	0	0	0	0	0	0	0	0	0	0	0
	212	0	0	0	0	0	0	0	0	0	0	0	0	0	0	0
	213	0	0	0	0	0	0	0	0	0	0	0	0	0	0	0
	214	0	0	0	0	0	0	0	0	0	0	0	0	0	0	0
	215	0	0	0	0	0	0	0	0	5	0	0	0	0	5	5
	216	0	0	0	0	0	0	1	0	1	0	0	0	0	2	2
	217	0	0	0	0	0	0	0	0	0	0	0	0	0	0	0
	218	0	0	0	0	0	0	0	0	0	0	0	0	0	0	0
	219	0	1	1	0	0	0	0	0	0	0	0	0	2	0	2
	220	0	6	0	0	0	0	0	0	0	0	0	0	6	0	6
	221	0	0	0	0	0	0	0	0	0	0	0	0	0	0	0
	222	0	0	0	0	0	0	0	0	0	0	0	0	0	0	0
	223	0	0	0	0	0	0	0	0	0	0	0	0	0	0	0
	224	0	0	0	0	0	0	1	0	0	0	0	0	0	1	1
	225	0	0	0	0	0	0	0	0	0	0	0	0	0	0	0
	226	0	0	0	0	0	0	0	0	0	0	0	0	0	0	0
	227	0	0	0	0	0	0	0	0	0	0	0	0	0	0	0
	228	0	0	0	0	0	0	0	0	0	0	0	0	0	0	0
	229	0	0	0	0	0	0	0	0	0	0	0	0	0	0	0
	230	0	0	0	0	0	0	0	0	0	0	0	0	0	0	0
	231	0	0	1	0	0	0	0	1	1	0	0	0	1	2	3
	232	0	2	0	0	0	0	0	1	0	0	0	0	2	1	3
	233	0	0	0	0	0	0	0	0	0	0	0	0	0	0	0
	234	0	0	0	0	0	0	0	0	0	0	0	0	0	0	0
	235	0	0	0	0	0	0	0	0	0	0	0	0	0	0	0
	236	0	0	0	0	0	0	0	0	0	0	0	0	0	0	0
	237	0	0	0	0	0	0	0	0	0	0	0	0	0	0	0
	238	0	0	0	0	0	0	0	0	1	0	0	0	0	1	1
	239	0	0	0	0	0	0	0	0	3	0	0	0	0	3	3
	240	0	0	0	0	0	0	0	0	0	0	0	0	0	0	0
	241	0	0	5	0	0	0	0	0	0	0	0	0	5	0	5
	242	0	0	0	0	0	0	0	0	0	0	0	0	0	0	0
	243	1	1	0	0	0	0	0	0	0	0	0	0	2	0	2
	244	1	0	0	0	0	0	0	0	0	0	0	0	1	0	1
	245	0	0	0	0	0	0	0	0	0	0	0	0	0	0	0
	246	0	0	1	0	0	0	0	0	0	0	0	0	1	0	1
	247	0	0	0	0	0	0	0	0	0	0	0	0	0	0	0
	248	0	0	0	0	0	0	0	0	0	0	0	0	0	0	0
	249	0	0	0	0	0	0	0	0	1	2	0	0	0	3	3
	250	0	0	0	0	0	0	0	0	7	0	0	0	0	7	7
	251	0	1	0	0	0	0	1	1	0	0	0	0	1	2	3
	252	0	0	0	0	0	0	0	0	1	0	0	0	0	1	1
	253	0	0	1	0	0	0	0	1	0	0	0	0	1	1	2
	254	0	0	0	0	0	0	0	1	0	0	0	0	0	1	1
	255	0	0	0	0	0	0	0	0	0	0	0	0	0	0	0
	256	0	1	0	0	0	0	0	0	0	0	0	0	1	0	1
	257	1	0	0	0	0	0	0	0	0	0	0	0	1	0	1
	258	0	0	0	1	0	0	0	0	0	0	0	0	1	0	1
	259	0	0	0	0	0	0	0	1	4	0	0	0	0	5	5
	260	0	0	0	0	0	0	2	4	5	0	0	0	0	11	11
	261	0	0	0	0	0	0	0	2	1	0	0	0	0	3	3
	262	0	0	0	0	0	0	0	3	0	0	0	0	0	3	3
	263	0	0	0	0	0	0	0	0	0	0	0	0	0	0	0
	264	0	0	0	0	0	0	0	0	0	0	0	0	0	0	0
	265	0	0	0	0	0	0	1	13	1	2	0	0	0	17	17
	266	0	0	1	0	0	0	0	1	0	0	0	0	1	1	2
	267	0	0	0	0	0	0	0	0	0	0	0	0	0	0	0
	268	0	0	0	0	0	0	0	0	0	0	0	0	0	0	0
	269	0	0	0	0	0	0	0	0	0	0	0	0	0	0	0
	270	0	0	0	0	0	0	0	0	0	0	0	0	0	0	0
	271	0	0	0	0	0	0	0	0	0	0	0	0	0	0	0
	272	0	0	0	0	0	0	0	0	0	0	0	0	0	0	0
	273	0	0	0	0	0	0	0	0	0	0	0	0	0	0	0
	274	0	0	0	0	0	0	0	0	0	0	0	0	0	0	0
	275	0	0	0	0	0	0	0	0	0	0	0	0	0	0	0
	276	0	0	0	0	0	0	0	0	0	0	0	0	0	0	0
	277	0	0	0	0	0	0	0	0	0	0	0	0	0	0	0
	278	0	0	0	0	0	0	0	0	0	0	0	0	0	0	0
	279	0	0	0	0	0	0	0	0	0	0	0	0	0	0	0
	280	0	0	0	0	0	0	0	0	0	0	0	0	0	0	0
	281	0	0	0	0	0	0	0	1	0	0	0	0	0	1	1
	282	0	0	0	0	0	0	0	0	0	0	0	0	0	0	0
	283	0	2	0	0	0	0	0	2	2	0	0	0	2	4	6
	284	0	0	0	0	0	0	0	0	0	0	0	0	0	0	0
	285	0	0	0	0	0	0	0	0	0	0	0	0	0	0	0
	286	0	0	0	0	0	0	0	0	0	0	0	0	0	0	0
	287	0	0	0	0	0	0	0	0	0	0	0	0	0	0	0
	288	0	0	0	0	0	0	0	0	0	0	0	0	0	0	0
	289	0	0	0	0	0	0	0	0	0	0	0	0	0	0	0
	290	0	0	0	0	0	0	0	0	0	0	0	0	0	0	0
	291	0	0	0	0	0	0	0	0	0	0	0	0	0	0	0
	292	0	0	0	0	0	0	0	0	0	0	0	0	0	0	0
	293	0	0	0	0	0	0	0	0	0	0	0	0	0	0	0
	294	0	0	0	0	0	0	0	0	0	0	0	0	0	0	0
	295	0	0	0	0	0	0	0	0	0	0	0	0	0	0	0
	296	0	0	0	0	0	0	0	0	0	0	0	0	0	0	0
	297	0	0	0	0	0	0	0	0	0	0	0	0	0	0	0
	298	0	0	0	0	0	0	0	0	0	0	0	0	0	0	0
	299	0	0	0	0	0	0	0	0	0	0	0	0	0	0	0
	300	0	0	0	0	0	0	0	0	0	0	0	0	0	0	0
	301	0	0	0	0	0	0	0	0	0	0	0	0	0	0	0
	302	0	0	0	0	0	0	0	0	0	0	0	0	0	0	0
	303	0	0	0	0	0	0	0	0	0	0	0	0	0	0	0
	304	0	0	0	0	0	0	0	0	0	0	0	0	0	0	0
	305	0	0	0	0	0	0	0	0	0	0	0	0	0	0	0
	306	0	0	0	0	0	0	0	0	0	0	0	0	0	0	0
	307	0	1	2	0	0	0	0	0	0	0	0	0	3	0	3
	308	0	0	0	0	0	0	0	0	0	0	0	0	0	0	0
	309	0	0	0	0	0	0	0	0	0	0	0	0	0	0	0
	310	0	0	1	0	0	0	0	0	0	0	0	0	1	0	1
	311	0	1	0	0	0	0	0	0	0	0	0	0	1	0	1
	312	0	0	0	0	0	0	0	0	0	0	0	0	0	0	0
	313	0	2	0	2	0	0	0	0	0	0	0	0	4	0	4
	314	0	0	0	0	0	0	0	0	0	0	0	0	0	0	0
	315	0	1	0	0	0	0	0	0	0	0	0	0	1	0	1
	316	0	0	0	0	0	0	0	0	0	0	1	0	0	1	1
	317	0	0	0	0	0	0	0	1	1	0	0	0	0	2	2
	318	0	0	0	0	0	0	2	6	3	0	0	0	0	11	11
	319	1	0	4	0	0	1	1	1	8	0	0	0	6	10	16
	320	0	0	1	1	2	0	2	1	0	0	0	0	4	3	7
	321	0	0	4	2	0	0	0	0	0	1	0	0	6	1	7
	322	0	0	2	0	1	0	0	0	0	0	0	0	3	0	3
	323	0	1	0	0	0	0	0	0	0	0	0	0	1	0	1
	324	0	2	0	0	0	0	0	10	2	0	1	0	2	13	15
	325	0	0	0	0	0	0	0	3	1	1	0	0	0	5	5
	326	0	4	0	1	0	0	0	1	0	0	0	0	5	1	6
	327	0	2	1	0	0	0	0	0	0	0	0	0	3	0	3
	328	0	0	0	0	0	0	0	2	2	0	0	0	0	4	4
	329	1	1	1	0	0	0	1	0	0	0	0	0	3	1	4
	330	0	1	10	0	0	0	0	7	0	1	0	0	11	8	19
	331	0	1	4	0	0	0	0	0	0	0	0	0	5	0	5
	332	0	7	0	0	0	0	0	0	1	0	0	0	7	1	8
	333	0	0	0	0	0	0	0	0	0	0	0	0	0	0	0
	334	0	3	1	0	0	0	0	0	0	0	0	0	4	0	4
	335	0	2	2	0	0	0	0	0	0	0	0	0	4	0	4
	336	0	2	1	0	0	0	0	0	0	0	0	0	3	0	3
	337	0	1	1	1	0	0	0	0	0	0	0	0	3	0	3
	338	1	1	4	1	2	0	0	0	0	0	0	0	9	0	9
	339	0	2	5	0	0	0	0	0	0	0	0	0	7	0	7
	340	0	20	5	0	0	1	0	0	1	0	0	0	26	1	27
	341	7	18	0	0	2	0	0	0	0	0	0	0	27	0	27
	342	2	0	0	0	0	1	0	0	0	0	0	0	3	0	3
	343	0	0	0	0	0	0	0	0	0	0	0	0	0	0	0
	344	0	0	0	0	0	0	0	0	0	0	0	0	0	0	0
	345	0	0	0	0	0	0	0	0	0	0	0	0	0	0	0
	346	0	1	0	0	0	0	0	1	0	0	0	0	1	1	2
	347	0	0	0	0	0	0	0	0	0	0	0	0	0	0	0
	348	0	0	0	0	0	0	0	0	0	0	0	0	0	0	0
	349	0	0	0	0	0	0	0	0	0	0	0	0	0	0	0
	350	3	0	1	0	0	0	0	0	0	0	0	0	4	0	4
	351	0	0	0	0	0	0	0	0	0	0	0	0	0	0	0
	352	0	0	0	0	1	0	0	0	0	0	0	0	1	0	1
	353	0	0	0	0	0	0	0	0	0	0	0	0	0	0	0
	354	0	0	6	0	0	0	0	0	0	0	0	0	6	0	6
	355	0	0	0	0	0	0	0	0	0	0	0	0	0	0	0
	356	0	0	0	0	0	0	0	0	0	0	0	0	0	0	0
	357	1	0	0	0	0	0	0	0	0	0	1	0	1	1	2
	358	0	0	0	0	0	0	0	0	0	0	0	0	0	0	0
	359	0	0	0	0	0	0	0	0	0	0	0	0	0	0	0
	360	0	0	0	0	0	0	0	1	0	0	0	0	0	1	1
	361	0	0	0	0	0	0	0	1	0	1	0	0	0	2	2
	362	0	0	2	0	0	0	11	1	16	1	0	0	2	29	31
	363	0	3	1	0	0	0	0	19	18	3	0	0	4	40	44
	364	0	3	2	1	0	0	2	0	1	0	0	0	6	3	9
	365	0	0	1	0	0	0	0	1	0	0	0	0	1	1	2
	366	1	0	2	1	0	1	0	0	1	0	0	0	5	1	6
	367	0	2	0	1	0	0	0	0	0	0	0	0	3	0	3
	368	0	4	9	0	0	0	0	0	0	0	0	0	13	0	13
	369	0	13	7	0	0	0	0	0	0	0	0	0	20	0	20
	370	1	0	1	0	0	0	0	0	0	1	0	0	2	1	3
	371	0	1	0	0	0	0	0	0	0	0	0	0	1	0	1
	372	0	0	0	0	0	0	0	0	0	0	0	0	0	0	0
	373	0	0	0	0	0	0	0	1	1	0	0	0	0	2	2
	374	0	2	0	0	0	0	0	0	0	0	0	0	2	0	2
	375	0	0	0	0	1	0	0	0	0	0	0	0	1	0	1
	376	0	1	0	0	0	0	0	7	3	0	0	0	1	10	11
	377	0	0	0	0	0	0	0	0	0	0	0	0	0	0	0
	378	0	0	0	0	0	0	0	0	0	0	0	0	0	0	0
	379	0	0	1	0	0	0	0	0	0	0	0	0	1	0	1
	380	0	0	0	0	0	0	0	0	0	0	0	0	0	0	0
	381	0	0	0	0	0	0	0	0	0	0	0	0	0	0	0
	382	0	0	0	0	0	0	0	0	1	0	0	0	0	1	1
	383	0	0	0	0	0	0	0	0	0	0	0	0	0	0	0
	384	0	0	0	0	0	0	0	0	0	0	0	0	0	0	0
	385	0	0	0	0	0	0	0	0	0	0	0	0	0	0	0
	386	0	0	0	0	0	0	0	0	0	0	0	0	0	0	0
	387	0	0	1	0	0	0	0	0	0	0	0	0	1	0	1
	388	0	1	0	0	0	0	0	0	0	0	0	0	1	0	1
	389	0	0	0	0	0	0	0	0	1	0	0	0	0	1	1
	390	0	0	0	0	0	0	0	0	0	0	0	0	0	0	0
	391	0	4	1	0	0	0	0	0	0	0	0	0	5	0	5
	392	0	0	1	0	0	0	0	0	0	0	0	0	1	0	1
	393	0	0	0	0	0	0	0	0	0	0	0	0	0	0	0
	394	0	0	0	0	0	0	0	0	0	0	0	0	0	0	0
	395	0	0	11	1	0	0	0	0	0	0	0	0	12	0	12
	396	0	0	0	0	0	0	0	0	0	0	0	0	0	0	0
	397	0	1	0	0	0	0	1	0	0	0	0	0	1	1	2
	398	0	2	2	0	0	0	0	2	0	0	0	0	4	2	6
	399	0	2	0	0	0	0	0	0	1	0	0	0	2	1	3
	400	0	0	0	0	0	0	0	1	1	0	0	0	0	2	2
	401	0	0	2	0	2	0	0	0	0	0	0	0	4	0	4
	402	0	0	1	2	1	0	0	0	0	0	0	0	4	0	4
	403	0	0	1	0	0	0	0	0	0	0	0	0	1	0	1
	404	0	0	0	0	0	0	0	0	0	0	0	0	0	0	0
	405	0	1	2	0	0	0	0	2	0	0	0	0	3	2	5
	406	2	1	1	0	0	0	0	0	1	0	0	0	4	1	5
	407	0	3	0	0	0	0	0	0	0	0	0	0	3	0	3
	408	0	2	0	0	0	0	0	0	0	0	0	0	2	0	2
	409	1	1	0	0	0	0	0	0	0	0	0	0	2	0	2
	410	0	0	0	0	0	0	0	0	0	0	0	0	0	0	0
	411	0	0	0	0	0	0	0	1	2	0	0	0	0	3	3
	412	0	0	0	0	0	0	0	0	0	0	0	0	0	0	0
	413	0	2	0	0	0	0	0	0	1	0	0	0	2	1	3
	414	0	0	0	0	0	0	0	4	0	0	0	0	0	4	4
	415	0	0	0	0	0	0	1	1	1	1	0	0	0	4	4
	416	0	0	0	0	0	0	0	1	6	0	0	0	0	7	7
	417	0	0	0	0	0	0	0	1	0	0	0	0	0	1	1
	418	1	1	2	0	0	0	0	0	0	0	0	0	4	0	4
	419	0	2	2	1	1	0	2	1	0	0	0	0	6	3	9
	420	0	1	20	0	0	0	1	0	1	0	0	0	21	2	23
	421	0	12	4	0	0	0	0	1	2	0	0	0	16	3	19
	422	0	0	0	0	0	0	1	4	0	0	0	0	0	5	5
	423	0	0	0	0	0	0	1	0	0	0	0	0	0	1	1
	424	0	0	0	0	0	0	0	0	1	0	0	1	0	2	2
	425	0	1	0	0	0	0	0	0	0	0	0	0	1	0	1
	426	89	1	1	1	7	0	0	0	0	0	0	0	99	0	99
	427	0	1	0	0	0	0	2	2	10	2	0	0	1	16	17
	428	0	0	1	0	0	0	0	0	0	0	0	0	1	0	1
	429	0	1	0	1	1	0	0	1	0	1	0	0	3	2	5
	430	9	2	31	21	5	1	0	2	0	1	0	0	69	3	72
	431	0	23	27	9	1	6	0	0	0	0	0	0	66	0	66
	432	76	55	24	7	11	143	0	0	0	1	0	0	316	1	317
	433	6	2	2	0	8	2	5	0	1	0	0	2	20	8	28
	434	17	6	5	34	17	94	0	0	1	1	1	0	173	3	176
	435	0	0	2	1	15	0	0	1	0	0	1	0	18	2	20
	436	0	0	0	30	0	0	1	1	6	4	3	1	30	16	46
	437	2	2	16	0	1	12	1	0	5	0	0	0	33	6	39
	438	5	108	0	29	111	35	2	1	0	0	0	0	288	3	291
	439	11	1	9	28	8	14	5	3	1	0	1	0	71	10	81
	440	0	20	88	32	59	29	5	4	0	0	0	0	228	9	237
	441	2	31	18	6	10	3	5	0	0	0	0	0	70	5	75
	442	7	2	1	0	1	0	0	1	0	2	0	0	11	3	14
	443	18	3	1	1	3	0	0	0	0	0	0	0	26	0	26
	444	8	1	0	0	0	0	1	0	0	0	1	0	9	2	11
	445	1	0	0	0	0	0	1	0	0	0	1	2	1	4	5
	446	1	0	0	0	7	11	1	1	0	1	0	4	19	7	26
	447	0	0	0	1	19	4	0	2	0	0	0	0	24	2	26
	448	1	0	2	52	28	8	0	1	2	0	0	0	91	3	94
	449	0	1	7	11	1	14	6	18	0	1	9	2	34	36	70
	450	3	31	20	4	10	5	2	1	1	0	0	1	73	5	78
	451	28	15	4	23	5	1	0	1	0	0	1	0	76	2	78
	452	10	11	18	5	4	13	1	1	0	0	1	0	61	3	64
	453	1	31	5	2	22	8	0	1	0	0	1	1	69	3	72
	454	86	27	7	59	21	31	0	0	0	0	0	0	231	0	231
	455	103	36	115	80	64	50	0	0	0	0	0	1	448	1	449
	456	23	31	59	23	20	41	0	0	0	0	0	0	197	0	197
	457	1	0	0	1	2	1	1	0	0	0	0	0	5	1	6
	458	6	2	3	2	6	2	0	4	21	6	8	8	21	47	68
	459	1	2	2	1	0	20	5	9	3	1	2	2	26	22	48
	460	1	27	4	1	22	0	0	3	0	2	0	0	55	5	60
	461	32	3	2	120	5	25	19	31	25	0	0	2	187	77	264
	462	1	3	62	2	25	0	7	11	4	0	0	1	93	23	116
	463	6	101	1	2	1	0	1	1	0	0	0	0	111	2	113
	464	59	0	4	0	0	1	1	0	0	0	0	0	64	1	65
	465	4	2	6	0	0	2	0	0	0	0	0	0	14	0	14
	466	6	4	1	3	1	1	0	0	1	0	0	0	16	1	17
	467	0	0	0	1	2	1	0	0	0	0	0	0	4	0	4
	468	0	0	0	0	3	0	0	0	0	0	0	1	3	1	4
	469	0	0	1	1	0	0	0	0	0	0	0	0	2	0	2
	470	11	7	2	21	5	1	0	0	0	0	0	1	47	1	48
	471	0	2	1	2	0	0	0	0	0	0	0	0	5	0	5
	472	3	15	6	2	4	11	0	0	0	0	0	0	41	0	41
	473	1	4	0	0	1	8	0	0	0	0	0	0	14	0	14
	474	3	0	0	2	7	4	0	0	0	0	0	0	16	0	16
	475	0	0	0	30	3	1	0	0	0	0	0	0	34	0	34
	476	0	2	12	1	0	0	0	0	0	0	0	0	15	0	15
	477	0	15	1	0	1	2	0	0	0	0	0	0	19	0	19
	478	0	0	0	0	0	0	0	0	4	1	7	3	0	15	15
	479	2	2	1	2	1	0	0	1	0	2	7	4	8	14	22
	480	3	9	5	5	2	7	0	1	0	2	0	1	31	4	35
	481	11	2	2	0	6	0	2	0	1	1	3	2	21	9	30
	482	8	10	3	64	20	5	2	1	0	1	1	0	110	5	115
	483	1	1	17	6	0	2	3	0	2	3	1	3	27	12	39
	484	2	18	6	3	4	81	2	8	3	8	4	4	114	29	143
	485	64	17	4	3	151	339	21	85	60	9	12	17	578	204	782
	486	22	2	0	60	233	18	19	23	5	8	22	18	335	95	430
	487	0	0	38	106	10	55	9	10	0	1	2	1	209	23	232
	488	8	132	44	41	56	2	5	0	1	0	0	0	283	6	289
	489	48	9	54	20	1	39	1	2	0	0	0	0	171	3	174
	490	19	33	29	0	33	36	2	1	1	0	0	0	150	4	154
	491	9	17	3	25	14	1	0	0	1	0	0	0	69	1	70
	492	6	1	26	25	6	10	0	0	0	0	0	0	74	0	74
	493	5	96	90	15	2	21	0	0	0	0	0	0	229	0	229
	494	49	101	4	10	24	15	0	0	0	0	0	0	203	0	203
	495	2	1	2	0	2	0	2	0	1	1	2	4	7	10	17
	496	0	0	0	0	0	0	0	0	0	0	1	0	0	1	1
	497	0	3	5	0	1	1	0	0	0	3	0	0	10	3	13
	498	0	3	0	0	0	4	1	0	0	0	0	0	7	1	8
	499	18	0	0	0	13	107	1	0	1	0	0	3	138	5	143
	500	1	0	0	0	2	1	0	0	0	0	0	0	4	0	4
	501	0	5	0	10	3	3	0	0	0	0	0	0	21	0	21
	502	0	6	14	14	5	3	0	0	0	0	0	0	42	0	42
	503	0	5	4	3	0	3	0	0	0	0	0	0	15	0	15
	504	15	43	6	2	1	0	0	0	0	0	0	0	67	0	67
	505	21	15	0	3	0	0	0	0	0	0	0	0	39	0	39
	506	106	2	10	3	1	1	0	0	0	0	0	0	123	0	123
	507	6	2	3	3	2	0	0	0	0	0	0	0	16	0	16
	508	1	0	1	1	0	0	0	0	0	0	0	0	3	0	3
	509	0	0	0	0	0	0	0	0	0	0	0	0	0	0	0
	510	2	0	0	1	0	1	0	0	0	0	0	0	4	0	4
	511	0	0	0	0	1	0	0	0	0	0	0	0	1	0	1
	512	0	0	0	0	0	0	0	0	0	0	0	0	0	0	0
	513	0	0	0	0	1	0	0	0	0	0	0	0	1	0	1
	514	0	0	1	0	5	2	0	0	0	0	0	0	8	0	8
	515	1	0	1	1	2	3	1	0	0	0	0	0	8	1	9
	516	2	9	5	10	4	5	0	0	0	0	0	0	35	0	35
	517	3	4	1	1	4	3	0	0	0	0	0	0	16	0	16
	518	3	3	3	2	0	1	0	0	0	0	0	1	12	1	13
	519	0	2	0	1	0	1	0	0	0	1	0	0	4	1	5
	520	0	1	1	2	0	0	0	1	1	0	0	0	4	2	6
	521	1	3	2	0	0	3	1	0	0	0	0	0	9	1	10
	522	10	4	0	0	1	1	0	0	0	0	0	0	16	0	16
	523	0	0	1	0	0	0	0	0	0	0	0	0	1	0	1
	524	0	0	0	0	0	0	0	3	0	0	1	0	0	4	4
	525	0	0	1	0	0	0	0	0	0	0	0	0	1	0	1
	526	1	0	0	0	0	0	0	0	0	0	0	1	1	1	2
	527	0	0	0	0	0	0	0	0	0	0	0	0	0	0	0
	528	0	0	0	0	0	0	0	0	0	1	0	0	0	1	1
	529	0	0	0	0	0	0	0	0	0	0	3	0	0	3	3
	530	0	0	0	0	0	0	0	2	1	4	2	0	0	9	9
	531	0	0	0	0	0	0	0	0	1	0	0	1	0	2	2
	532	0	0	0	0	0	0	0	0	0	0	2	0	0	2	2
	533	0	0	0	0	0	0	10	13	8	29	0	13	0	73	73
	534	0	0	0	0	0	0	4	12	28	0	1	2	0	47	47
	535	0	0	0	0	0	0	1	5	0	1	0	3	0	10	10
	536	0	0	0	0	0	0	3	0	0	0	1	1	0	5	5
	537	0	0	0	0	0	0	0	1	2	1	4	0	0	8	8
	538	0	1	1	0	0	0	4	1	3	4	0	2	2	14	16
	539	2	0	1	0	0	0	2	3	2	0	1	0	3	8	11
	540	0	0	0	1	0	0	4	0	1	0	0	1	1	6	7
	541	5	2	0	0	0	3	2	0	1	4	1	0	10	8	18
	542	0	0	0	0	0	0	8	1	13	4	0	4	0	30	30
	543	1	0	0	0	0	0	2	2	14	1	2	0	1	21	22
	544	0	0	0	0	0	0	0	0	0	0	0	0	0	0	0
	545	1	3	0	0	2	1	1	0	0	0	0	0	7	1	8
	546	0	0	0	0	0	0	0	0	0	0	0	0	0	0	0
	547	0	0	0	0	0	0	0	0	0	0	0	0	0	0	0
	548	0	0	0	0	0	0	0	0	0	0	0	0	0	0	0
	549	0	0	0	0	0	0	0	0	0	0	0	0	0	0	0
	550	0	0	0	2	0	2	0	0	0	0	0	0	4	0	4
	551	0	0	1	0	0	0	0	0	0	0	0	0	1	0	1
	552	0	1	1	4	1	4	0	0	0	2	0	1	11	3	14
	553	2	0	1	0	1	0	0	0	0	1	0	0	4	1	5
	554	1	3	4	0	0	1	0	0	3	0	0	0	9	3	12
	555	7	1	0	0	0	2	0	5	1	0	0	0	10	6	16
	556	2	1	1	0	1	0	0	0	0	0	0	0	5	0	5
	557	3	3	1	4	2	3	0	1	0	0	0	0	16	1	17
	558	14	5	13	11	27	24	0	0	0	0	0	0	94	0	94
	559	3	18	14	14	13	29	0	2	2	3	3	3	91	13	104
	560	17	6	2	5	9	7	1	4	2	0	0	3	46	10	56
	561	2	0	1	0	0	0	1	2	3	0	1	1	3	8	11
	562	1	0	0	0	0	1	7	3	0	7	1	4	2	22	24
	563	1	4	1	0	1	0	12	8	11	4	5	7	7	47	54
	564	1	0	2	0	0	0	3	15	11	2	6	0	3	37	40
	565	2	0	0	1	6	0	13	14	16	17	34	15	9	109	118
	566	2	1	3	26	1	3	0	0	1	0	0	3	36	4	40
	567	2	7	77	14	11	33	1	3	0	1	0	1	144	6	150
	568	2	18	2	1	9	0	1	0	0	0	0	0	32	1	33
	569	12	9	1	6	6	5	3	0	4	8	3	0	39	18	57
	570	9	1	5	2	4	1	0	4	6	1	2	8	22	21	43
	571	1	4	1	4	2	6	2	3	3	3	4	6	18	21	39
	572	4	5	13	11	21	85	1	0	0	1	4	2	139	8	147
	573	0	1	1	1	11	5	0	4	9	2	3	1	19	19	38
	574	2	0	1	16	7	8	1	6	0	2	0	0	34	9	43
	575	2	1	4	5	5	9	1	1	0	0	0	0	26	2	28
	576	4	33	47	19	25	149	0	1	1	0	1	3	277	6	283
	577	6	10	3	9	45	3	0	0	0	1	5	3	76	9	85
	578	48	20	25	152	6	4	0	0	3	6	4	0	255	13	268
	579	3	10	59	0	2	0	0	7	28	6	2	0	74	43	117
	580	9	25	5	1	1	6	0	11	1	2	0	0	47	14	61
	581	43	19	2	2	3	0	1	6	0	0	2	0	69	9	78
	582	15	0	0	3	1	0	5	2	1	5	3	0	19	16	35
	583	3	1	17	2	0	0	0	1	0	1	1	0	23	3	26
	584	7	56	3	1	1	1	1	1	0	0	0	0	69	2	71
	585	306	33	4	0	10	53	0	0	0	2	0	1	406	3	409
	586	66	9	9	18	86	12	0	0	0	0	0	0	200	0	200
	587	8	0	2	9	0	1	1	0	1	0	0	0	20	2	22
	588	3	0	2	0	0	0	0	0	0	0	1	0	5	1	6
	589	1	9	1	2	0	0	0	2	1	0	1	0	13	4	17
	590	8	0	1	0	0	1	0	0	0	0	0	0	10	0	10
	591	0	0	0	0	0	0	1	2	3	0	0	0	0	6	6
	592	0	1	3	6	8	1	0	0	0	0	0	1	19	1	20
	593	0	0	9	15	7	2	1	0	0	1	1	0	33	3	36
	594	0	3	3	0	2	2	0	1	4	1	0	0	10	6	16
	595	21	25	4	8	3	3	1	2	1	0	3	0	64	7	71
	596	21	7	7	9	20	58	1	3	0	5	0	3	122	12	134
	597	0	3	1	2	3	1	10	14	7	0	3	2	10	36	46
	598	1	0	0	1	4	0	3	4	0	0	1	0	6	8	14
	599	1	0	0	0	1	0	4	0	0	1	0	0	2	5	7
	600	0	0	1	0	0	0	0	8	0	0	0	0	1	8	9
	601	3	4	3	4	0	6	3	1	0	0	4	0	20	8	28
	602	0	8	0	0	2	0	0	1	0	1	0	0	10	2	12
	603	1	0	0	0	0	0	9	7	11	0	0	0	1	27	28
	604	0	0	0	0	0	0	8	19	0	0	0	0	0	27	27
	605	1	0	0	0	0	0	0	0	0	0	0	0	1	0	1
	606	0	0	0	0	0	0	0	0	0	0	0	0	0	0	0
	607	0	0	0	0	0	0	0	0	0	0	0	0	0	0	0
	608	0	0	0	0	0	0	0	0	0	0	0	0	0	0	0
	609	0	0	0	0	0	0	0	0	0	0	0	0	0	0	0
	610	0	0	0	0	0	0	0	0	0	0	0	0	0	0	0
	611	0	0	0	0	0	0	0	0	0	0	0	0	0	0	0
	612	0	0	0	0	0	0	0	0	0	0	0	0	0	0	0
	613	0	0	0	0	0	0	0	0	0	0	0	0	0	0	0
	614	0	0	0	0	0	0	0	0	0	0	0	0	0	0	0
	615	0	0	0	0	0	0	0	0	0	0	0	0	0	0	0
	616	0	0	0	0	0	0	0	0	0	0	0	0	0	0	0
	617	0	0	0	0	0	0	0	0	0	0	0	0	0	0	0
	618	0	0	0	0	0	0	0	0	0	0	0	0	0	0	0
	619	0	0	0	0	0	0	0	0	0	0	0	0	0	0	0
	620	0	0	0	0	0	0	0	0	0	0	0	0	0	0	0
	621	0	0	0	0	0	0	0	0	0	0	0	0	0	0	0
	622	0	0	0	0	0	0	0	0	0	0	0	0	0	0	0
	623	0	0	0	0	0	0	0	0	0	0	0	0	0	0	0
	624	0	0	0	0	0	0	0	0	0	0	0	0	0	0	0
	625	0	0	0	0	0	0	0	0	0	0	0	0	0	0	0
	626	0	0	0	0	0	0	0	0	0	0	0	0	0	0	0
	627	0	0	0	0	0	0	0	0	0	0	0	0	0	0	0
	628	0	0	0	0	0	0	1	0	0	0	1	0	0	2	2
	629	0	0	0	0	0	1	3	2	3	0	4	0	1	12	13
	630	0	0	0	1	0	0	22	22	0	0	6	0	1	50	51
	631	0	0	0	0	0	0	1	14	6	1	0	0	0	22	22
	632	1	0	0	0	0	0	5	4	0	0	0	1	1	10	11
	633	0	2	0	0	0	0	0	0	0	0	0	0	2	0	2
	634	0	0	0	0	0	0	0	0	1	0	0	0	0	1	1
	635	0	0	0	0	0	0	2	9	4	5	3	3	0	26	26
	636	2	0	0	0	1	1	21	25	36	21	1	8	4	112	116
	637	0	1	2	1	2	1	1	8	2	6	16	12	7	45	52
	638	0	0	0	0	0	0	9	14	15	6	1	2	0	47	47
	639	0	1	3	1	2	1	0	8	2	0	0	0	8	10	18
	640	1	33	6	2	16	9	2	0	2	1	0	0	67	5	72
	641	5	6	0	1	0	0	0	0	0	0	0	32	12	32	44
	642	1	9	1	0	0	0	0	0	0	2	1	0	11	3	14
	643	0	0	0	0	0	0	0	7	1	0	0	0	0	8	8
	644	0	1	1	0	0	0	11	4	0	0	1	0	2	16	18
	645	4	5	1	3	0	1	2	0	0	0	0	3	14	5	19
	646	0	0	0	0	1	0	0	0	0	0	1	0	1	1	2
	647	0	0	0	0	2	1	0	1	0	0	0	1	3	2	5
	648	0	1	0	1	0	2	0	0	0	0	1	0	4	1	5
	649	0	0	0	1	0	7	0	0	0	3	6	9	8	18	26
	650	0	0	0	0	2	1	3	10	16	6	6	6	3	47	50
	651	0	0	0	0	0	0	6	23	2	7	5	4	0	47	47
	652	0	0	1	0	0	0	1	3	4	4	1	0	1	13	14
	653	0	3	0	0	0	0	0	1	5	0	0	0	3	6	9
	654	1	1	0	0	0	0	0	0	0	1	0	0	2	1	3
	655	0	0	0	0	0	0	2	0	0	0	0	0	0	2	2
	656	0	0	1	0	0	0	7	3	0	3	0	1	1	14	15
	657	0	0	0	0	0	0	1	0	0	0	0	0	0	1	1
	658	0	0	0	0	0	0	0	0	6	0	0	0	0	6	6
	659	0	0	0	0	0	0	1	4	0	0	0	0	0	5	5
	660	0	0	0	0	0	0	6	1	1	0	0	1	0	9	9
	661	0	0	0	0	0	0	0	0	0	0	0	0	0	0	0
	662	0	0	0	0	0	0	1	1	2	4	0	0	0	8	8
	663	0	0	0	0	0	0	0	1	1	0	0	2	0	4	4
	664	0	0	0	0	0	0	0	0	0	0	0	0	0	0	0
	665	0	0	0	0	0	1	0	1	0	2	0	2	1	5	6
	666	0	0	0	0	0	0	0	0	0	0	4	0	0	4	4
	667	0	1	0	3	0	11	0	0	0	0	0	1	15	1	16
	668	0	0	1	0	0	0	0	0	0	0	0	0	1	0	1
	669	0	0	0	0	2	0	0	2	0	0	0	1	2	3	5
	670	1	0	0	0	0	0	3	0	1	0	0	0	1	4	5
	671	0	0	0	0	0	0	3	0	0	0	0	1	0	4	4
	672	0	3	0	1	1	0	0	0	0	0	0	0	5	0	5
	673	2	0	0	0	0	0	6	2	0	0	0	0	2	8	10
	674	0	0	0	0	0	0	1	1	0	0	0	0	0	2	2
	675	4	1	1	0	0	0	2	0	0	0	0	0	6	2	8
	676	0	0	0	0	0	0	0	0	0	0	0	0	0	0	0
	677	6	1	0	0	0	0	2	1	0	0	0	0	7	3	10
	678	1	0	0	0	0	0	0	0	0	0	0	0	1	0	1
	679	0	0	0	0	0	0	0	0	0	0	0	0	0	0	0
	680	0	0	0	0	0	0	0	0	0	0	0	0	0	0	0
	681	0	0	0	0	0	0	0	0	0	0	0	0	0	0	0
	682	0	0	0	0	0	0	0	0	0	0	0	0	0	0	0
	683	0	0	0	0	0	0	0	0	0	0	0	0	0	0	0
	684	0	0	0	0	0	0	0	0	0	0	0	0	0	0	0
	685	0	0	0	0	0	0	0	0	0	0	0	0	0	0	0
	686	0	0	0	0	0	0	0	0	0	0	0	0	0	0	0
	687	0	0	0	0	0	0	0	0	0	0	0	0	0	0	0
	688	0	0	0	0	0	0	0	0	0	0	0	0	0	0	0
	689	0	0	0	0	0	0	0	0	0	0	0	0	0	0	0
	690	0	0	0	0	0	0	0	0	0	0	0	0	0	0	0
	691	0	0	0	0	0	0	0	0	0	0	0	0	0	0	0
	692	0	0	0	0	0	0	0	0	0	0	0	0	0	0	0
	693	0	0	0	0	0	0	0	0	0	0	0	0	0	0	0
	694	0	0	0	0	0	0	0	0	0	0	0	0	0	0	0
	695	0	0	0	0	0	0	0	0	0	0	0	0	0	0	0
	696	0	0	0	0	0	0	0	0	0	0	0	0	0	0	0
	697	0	1	0	0	0	0	0	0	0	0	0	0	1	0	1
	698	0	0	0	0	0	0	0	0	0	0	0	0	0	0	0
	699	10	21	11	4	2	3	0	0	0	0	0	0	51	0	51
	700	20	3	2	0	1	1	0	0	0	0	0	0	27	0	27
	701	1	0	0	0	0	1	0	0	0	1	2	0	2	3	5
	702	1	1	1	2	0	1	12	17	14	11	13	12	6	79	85
	703	1	7	3	7	4	1	0	0	0	0	0	0	23	0	23
	704	12	6	14	3	7	1	0	1	1	0	0	0	43	2	45
	705	1	8	9	0	3	3	1	0	0	0	0	0	24	1	25
	706	5	11	5	3	0	2	0	0	0	0	0	0	26	0	26
	707	9	15	6	11	9	3	0	1	1	0	0	0	53	2	55
	708	1	0	1	0	0	1	0	0	0	0	0	0	3	0	3
	709	0	1	0	1	0	0	0	0	1	0	1	0	2	2	4
	710	1	1	3	2	0	0	3	4	0	0	0	0	7	7	14
	711	0	0	1	0	0	1	2	4	6	0	0	0	2	12	14
	712	1	0	0	0	0	0	1	6	1	0	0	0	1	8	9
	713	0	0	0	0	0	0	0	1	0	0	0	11	0	12	12
	714	0	0	0	0	0	0	0	0	0	0	1	2	0	3	3
	715	0	1	0	1	0	0	2	0	0	2	1	4	2	9	11
	716	0	0	0	0	1	2	0	0	1	3	0	1	3	5	8
	717	0	0	0	0	6	0	0	1	1	3	1	2	6	8	14
	718	0	0	0	0	0	1	0	2	2	2	2	5	1	13	14
	719	2	0	1	0	0	0	1	3	1	1	11	3	3	20	23
	720	0	2	2	0	0	0	0	0	1	1	2	7	4	11	15
	721	2	1	0	0	0	0	1	0	0	5	2	3	3	11	14
	722	0	0	0	1	1	0	4	10	49	36	44	21	2	164	166
	723	0	0	0	0	0	0	1	7	8	12	6	5	0	39	39
	724	0	0	0	0	0	0	13	26	55	1	5	12	0	112	112
	725	0	0	0	0	0	0	31	63	22	0	13	5	0	134	134
	726	0	1	1	0	0	0	38	11	4	7	3	1	2	64	66
	727	0	1	0	0	1	0	5	2	1	0	0	1	2	9	11
	728	0	1	0	0	0	1	0	0	1	1	1	5	2	8	10
	729	0	0	0	0	0	0	4	5	10	4	6	2	0	31	31
	730	0	1	0	0	0	0	2	2	0	2	2	1	1	9	10
	731	0	0	0	0	0	0	5	6	10	3	5	1	0	30	30
	732	0	0	0	0	0	0	13	20	20	7	6	5	0	71	71
	733	0	0	0	0	0	0	0	3	0	1	0	0	0	4	4
	734	0	0	0	0	0	0	0	0	0	1	0	0	0	1	1
	735	0	0	0	0	0	1	0	0	1	0	1	2	1	4	5
	736	0	0	0	0	0	0	0	0	0	0	2	0	0	2	2
	737	0	0	0	0	0	0	0	0	1	1	4	6	0	12	12
	738	0	1	0	0	0	0	0	0	6	0	4	1	1	11	12
	739	0	0	0	0	0	0	5	29	7	16	10	8	0	75	75
	740	0	0	0	0	0	0	11	4	7	1	13	6	0	42	42
	741	0	0	0	0	0	0	0	8	3	1	0	8	0	20	20
	742	0	0	0	0	0	0	8	8	0	0	1	0	0	17	17
	743	1	0	0	0	0	0	0	9	5	6	6	5	1	31	32
	744	0	0	0	2	0	0	7	1	9	7	19	18	2	61	63
	745	0	0	0	0	0	0	0	3	1	3	4	1	0	12	12
	746	0	0	0	0	0	0	7	2	4	3	5	10	0	31	31
	747	0	0	1	1	0	6	2	3	5	4	4	18	8	36	44
	748	2	4	3	0	6	11	2	0	0	0	0	0	26	2	28
	749	1	1	5	6	19	2	5	0	0	0	1	4	34	10	44
	750	0	0	7	17	0	0	0	1	21	5	24	113	24	164	188
	751	10	22	17	6	4	7	3	8	2	3	19	8	66	43	109
	752	18	28	17	0	16	15	1	0	0	3	5	2	94	11	105
	753	19	16	4	13	10	6	0	0	1	1	1	1	68	4	72
	754	4	3	27	9	2	13	0	0	0	0	0	1	58	1	59
	755	2	28	27	9	7	2	5	1	1	0	0	0	75	7	82
	756	11	24	16	2	6	4	8	5	2	2	2	0	63	19	82
	757	30	19	28	8	8	10	1	1	2	0	0	1	103	5	108
	758	13	9	4	8	9	1	2	5	1	0	0	0	44	8	52
	759	14	6	10	0	2	1	0	0	1	0	0	1	33	2	35
	760	2	7	3	1	0	1	0	2	0	0	0	0	14	2	16
	761	4	7	4	0	2	0	1	4	2	0	2	4	17	13	30
	762	1	2	0	0	0	0	1	1	0	5	0	0	3	7	10
	763	1	0	2	0	0	0	1	0	3	0	0	0	3	4	7
	764	0	0	0	0	0	0	1	1	0	0	0	0	0	2	2
	765	0	2	0	0	0	0	7	3	1	0	0	0	2	11	13
	766	0	0	0	0	0	0	0	0	0	0	1	0	0	1	1
	767	0	0	0	0	0	0	0	0	1	0	0	0	0	1	1
	768	0	0	0	0	0	0	0	1	0	0	2	1	0	4	4
	769	0	2	0	0	0	0	1	0	0	2	3	1	2	7	9
	770	0	0	0	0	0	0	2	1	2	2	0	0	0	7	7
	771	0	0	0	1	1	0	1	1	6	1	0	5	2	14	16
	772	0	0	0	0	0	0	13	16	15	2	6	9	0	61	61
	773	1	0	0	0	1	0	18	19	1	23	12	7	2	80	82
	774	0	1	0	0	0	1	6	0	3	0	0	1	2	10	12
	775	2	0	0	1	1	0	0	1	1	1	0	0	4	3	7
	776	0	2	2	1	0	1	3	40	7	0	2	6	6	58	64
	777	0	1	3	0	1	0	7	0	0	0	1	1	5	9	14
	778	0	4	0	0	0	3	3	0	0	2	3	2	7	10	17
	779	2	0	0	0	0	6	1	1	0	0	1	0	8	3	11
	780	1	0	0	0	4	0	5	10	9	1	1	1	5	27	32
	781	0	0	0	2	0	2	0	0	3	2	2	0	4	7	11
	782	0	3	5	1	3	1	8	2	0	4	0	3	13	17	30
	783	8	6	6	8	13	5	1	0	1	0	3	20	46	25	71
	784	2	17	17	16	1	3	2	0	0	1	1	1	56	5	61
	785	10	12	11	1	0	7	0	0	0	0	0	0	41	0	41
	786	5	1	0	0	3	0	0	0	0	0	0	2	9	2	11
	787	2	1	0	0	0	0	2	3	1	0	0	1	3	7	10
	788	0	1	2	1	0	0	0	0	2	0	1	0	4	3	7
	789	0	0	0	0	1	0	8	3	1	8	3	1	1	24	25
	790	0	0	0	0	0	2	0	1	1	1	3	0	2	6	8
	791	0	0	0	0	0	0	9	7	3	26	18	42	0	105	105
	792	0	0	0	2	1	2	10	9	39	11	88	62	5	219	224
	793	3	1	10	0	0	2	10	14	8	24	51	343	16	450	466
	794	2	20	2	1	0	9	4	1	9	4	57	52	34	127	161
	795	6	1	4	0	7	3	3	18	25	99	330	146	21	621	642
	796	2	13	1	24	9	4	16	11	34	91	51	34	53	237	290
	797	10	0	50	4	3	5	3	46	59	30	15	3	72	156	228
	798	0	23	17	2	2	3	38	56	47	35	6	2	47	184	231
	799	0	1	0	0	0	0	22	39	17	8	5	0	1	91	92
	800	0	0	0	0	0	0	125	72	16	9	2	0	0	224	224
	801	0	0	0	0	0	0	87	41	15	1	0	4	0	148	148
	802	0	0	0	0	0	0	5	3	1	0	0	0	0	9	9
	803	0	0	0	0	0	0	4	4	0	1	1	1	0	11	11
	804	0	0	0	0	0	0	0	2	0	0	0	0	0	2	2
	805	1	0	0	0	0	0	2	0	0	0	0	0	1	2	3
	806	0	0	0	0	0	0	0	0	0	0	0	0	0	0	0
	807	0	0	0	0	0	0	0	0	0	0	0	0	0	0	0
	808	0	0	0	0	0	0	0	0	0	0	0	0	0	0	0
	809	0	0	0	0	0	0	0	0	0	0	0	0	0	0	0
	810	0	0	0	0	0	0	0	0	0	0	0	0	0	0	0
	811	0	0	0	0	0	0	0	0	0	0	0	0	0	0	0
	812	0	0	0	0	0	0	0	0	1	2	0	0	0	3	3
	813	0	1	0	0	1	4	0	0	2	3	0	0	6	5	11
	814	0	0	0	2	6	0	2	5	14	3	2	0	8	26	34
	815	0	0	4	11	1	0	2	3	0	1	2	1	16	9	25
	816	0	1	4	0	0	0	4	2	2	6	42	13	5	69	74
	817	3	2	0	0	0	0	2	3	9	12	5	1	5	32	37
	818	1	0	0	1	3	0	7	9	23	14	2	2	5	57	62
	819	0	0	1	3	0	0	10	36	16	1	3	1	4	67	71
	820	0	2	4	0	0	7	67	21	5	3	3	2	13	101	114
	821	3	3	0	0	2	5	4	1	0	0	1	9	13	15	28
	822	4	1	0	10	9	8	2	0	1	0	10	9	32	22	54
	823	2	4	16	11	10	12	5	4	5	1	1	9	55	25	80
	824	0	4	8	0	1	1	1	2	3	4	2	1	14	13	27
	825	2	15	57	19	16	1	1	0	0	1	1	0	110	3	113
	826	1	1	7	0	0	1	3	1	0	1	0	0	10	5	15
	827	5	31	12	0	2	0	0	0	4	0	1	0	50	5	55
	828	12	5	0	3	2	1	6	4	1	4	3	0	23	18	41
	829	2	2	3	0	0	2	0	0	0	0	0	0	9	0	9
	830	0	0	0	0	0	0	0	1	0	0	0	0	0	1	1
	831	0	3	1	0	0	0	7	1	3	2	0	0	4	13	17
	832	1	0	0	0	0	0	12	6	7	1	0	1	1	27	28
	833	2	0	0	0	0	0	2	6	1	1	1	1	2	12	14
	834	0	0	0	0	0	0	16	7	8	3	7	3	0	44	44
	835	0	0	0	0	0	0	1	2	0	4	0	0	0	7	7
	836	0	0	0	1	1	0	2	2	6	0	4	2	2	16	18
	837	0	0	0	1	0	0	3	15	1	0	2	0	1	21	22
	838	0	0	0	0	1	0	15	4	3	1	0	6	1	29	30
	839	0	1	0	0	1	0	8	0	3	3	2	0	2	16	18
	840	0	0	0	0	0	0	0	0	0	0	0	0	0	0	0
	841	0	0	1	0	1	0	0	0	4	0	1	3	2	8	10
	842	0	0	0	0	0	0	7	13	3	6	10	0	0	39	39
	843	0	0	0	1	1	0	5	1	0	4	2	3	2	15	17
	844	0	0	0	0	0	0	1	3	1	6	5	5	0	21	21
	845	1	0	0	0	0	0	0	1	4	4	4	1	1	14	15
	846	0	1	0	0	0	0	6	1	0	2	0	9	1	18	19
	847	0	0	0	0	1	0	1	0	4	5	60	114	1	184	185
	848	0	0	2	0	0	0	1	3	3	81	96	18	2	202	204
	849	0	0	0	0	0	0	5	16	13	268	42	24	0	368	368
	850	0	3	0	3	0	0	4	52	14	8	9	66	6	153	159
	851	3	0	1	0	2	1	23	16	2	5	18	9	7	73	80
	852	0	0	0	0	2	0	9	1	4	27	7	2	2	50	52
	853	0	0	0	0	0	0	4	2	29	11	3	3	0	52	52
	854	0	0	0	0	0	0	8	69	21	5	2	4	0	109	109
	855	0	0	0	0	0	1	12	7	1	0	15	14	1	49	50
	856	0	0	0	1	0	2	11	1	3	7	0	10	3	32	35
	857	1	0	0	3	7	1	7	4	21	5	36	3	12	76	88
	858	0	0	0	1	0	0	2	2	3	12	3	0	1	22	23
	859	0	4	4	0	0	1	9	0	4	2	0	11	9	26	35
	860	3	7	1	0	0	0	0	5	1	0	3	4	11	13	24
	861	2	0	0	0	0	0	5	0	0	10	3	7	2	25	27
	862	0	0	0	0	0	0	0	0	6	3	4	23	0	36	36
	863	0	0	0	0	1	0	0	39	12	14	47	30	1	142	143
	864	0	0	0	0	0	0	3	1	2	2	0	1	0	9	9
	865	1	0	0	0	0	0	0	2	2	3	0	1	1	8	9
	866	0	1	0	0	0	0	0	0	0	0	0	0	1	0	1
	867	1	0	0	0	0	0	2	0	0	2	0	0	1	4	5
	868	0	0	0	0	0	0	3	0	0	0	0	2	0	5	5
	869	2	0	0	0	1	2	0	0	0	0	0	0	5	0	5
	870	1	0	0	1	0	0	0	0	0	0	1	1	2	2	4
	871	0	0	2	0	0	0	0	0	2	0	2	2	2	6	8
	872	0	0	0	0	0	0	0	0	1	0	20	0	0	21	21
	873	0	0	0	0	0	0	2	2	6	30	4	8	0	52	52
	874	0	1	0	0	0	0	0	2	20	4	5	4	1	35	36
	875	1	0	0	0	0	1	2	15	0	5	5	1	2	28	30
	876	0	0	0	0	0	0	125	9	57	47	4	2	0	244	244
	877	0	0	0	0	0	1	20	14	64	8	4	7	1	117	118
	878	0	0	0	0	1	1	42	39	17	11	6	4	2	119	121
	879	0	0	1	0	0	0	1	1	1	1	0	1	1	5	6
	880	0	0	1	0	0	0	3	4	6	3	4	8	1	28	29
	881	0	0	0	0	0	0	0	1	0	0	1	4	0	6	6
	882	0	0	0	0	0	0	3	2	10	1	23	6	0	45	45
	883	0	0	0	0	0	0	0	1	6	3	1	16	0	27	27
	884	0	0	0	0	0	0	1	7	45	4	46	7	0	110	110
	885	0	0	0	0	0	1	14	45	1	100	48	311	1	519	520
	886	0	0	0	0	1	0	13	0	27	6	43	14	1	103	104
	887	0	0	0	0	0	0	0	1	0	10	2	12	0	25	25
	888	0	0	0	0	0	0	8	9	57	16	43	5	0	138	138
	889	0	2	0	0	0	0	2	3	0	2	0	1	2	8	10
	890	1	0	0	0	0	0	7	0	1	1	0	0	1	9	10
	891	2	0	0	0	0	0	1	11	0	0	0	0	2	12	14
	892	0	0	0	0	0	0	2	0	0	0	0	0	0	2	2
	893	0	0	0	0	0	0	0	1	0	0	0	1	0	2	2
	894	1	1	0	0	0	0	0	0	0	0	1	0	2	1	3
	895	0	0	1	0	0	0	0	0	1	0	0	0	1	1	2
	896	0	0	0	0	0	0	0	0	1	0	1	1	0	3	3
	897	0	0	0	0	0	0	0	0	0	0	0	0	0	0	0
	898	0	0	0	0	0	0	1	0	0	0	0	0	0	1	1
	899	0	0	0	0	0	0	0	1	0	0	0	0	0	1	1
	900	0	2	1	0	0	0	0	0	0	0	0	0	3	0	3
	901	0	0	1	0	0	0	0	1	0	0	0	0	1	1	2
	902	1	0	0	0	0	0	0	1	2	0	0	0	1	3	4
	903	0	0	0	0	0	0	0	0	0	0	0	0	0	0	0
	904	0	0	0	0	0	0	0	1	0	0	2	0	0	3	3
	905	0	0	0	0	0	0	0	0	0	1	1	2	0	4	4
	906	0	0	0	0	0	0	0	4	0	0	4	1	0	9	9
	907	0	0	0	0	0	2	1	0	0	2	1	1	2	5	7
	908	0	0	1	0	2	1	2	2	17	9	2	11	4	43	47
	909	3	1	0	2	0	0	1	11	2	1	1	0	6	16	22
	910	0	0	2	1	0	0	8	12	2	3	3	84	3	112	115
	911	0	1	0	1	1	0	2	1	1	2	12	13	3	31	34
	912	2	5	2	0	1	0	2	1	0	20	24	50	10	97	107
	913	18	1	2	0	0	1	1	0	1	6	12	83	22	103	125
	914	0	1	2	1	2	0	0	3	3	2	42	2	6	52	58
	915	0	0	0	0	1	0	0	4	8	39	0	0	1	51	52
	916	0	2	0	0	0	0	3	10	61	4	2	0	2	80	82
	917	0	0	0	2	0	1	3	41	1	0	0	2	3	47	50
	918	0	1	0	2	1	0	69	3	2	1	0	0	4	75	79
	919	1	2	0	0	0	0	0	1	0	0	2	0	3	3	6
	920	1	1	1	0	0	0	1	1	2	0	0	0	3	4	7
	921	0	3	1	1	2	0	1	1	1	0	0	0	7	3	10
	922	0	0	0	2	0	0	0	0	0	1	0	1	2	2	4
	923	0	2	0	0	1	0	1	0	0	0	0	2	3	3	6
	924	0	1	0	0	0	0	0	0	0	0	0	1	1	1	2
	925	0	0	0	0	0	0	0	0	0	1	0	1	0	2	2
	926	0	0	0	0	0	0	0	0	0	0	0	0	0	0	0
	927	0	0	0	0	0	0	0	0	0	0	0	0	0	0	0
	928	0	0	0	0	0	0	0	0	0	0	0	0	0	0	0
	929	0	0	0	0	0	0	0	0	0	1	0	1	0	2	2
	930	0	0	0	0	0	0	0	0	0	0	0	0	0	0	0
	931	0	0	0	0	0	0	0	1	0	0	0	0	0	1	1
	932	0	0	0	0	0	0	0	0	2	0	0	0	0	2	2
	933	0	1	0	0	0	2	3	17	0	1	6	4	3	31	34
	934	0	0	0	0	0	0	1	1	1	3	3	1	0	10	10
	935	0	0	0	0	0	0	0	4	0	2	2	8	0	16	16
	936	0	0	0	0	1	0	10	15	18	13	83	32	1	171	172
	937	1	0	1	4	0	0	2	3	4	21	10	10	6	50	56
	938	0	1	3	3	0	0	14	22	97	39	20	21	7	213	220
	939	0	0	1	1	0	1	18	89	83	39	42	37	3	308	311
	940	2	0	3	0	0	0	14	9	5	4	14	1	5	47	52
	941	0	1	2	1	0	0	6	0	1	1	0	0	4	8	12
	942	0	0	0	0	0	1	20	12	16	3	4	8	1	63	64
	943	0	0	7	3	8	4	1	2	0	2	14	1	22	20	42
	944	0	0	1	0	0	1	21	2	7	18	0	0	2	48	50
	945	0	0	0	0	0	0	0	1	3	0	0	3	0	7	7
	946	2	0	0	0	0	0	0	1	0	0	3	0	2	4	6
	947	2	0	1	0	0	0	2	0	0	0	1	0	3	3	6
	948	1	1	0	1	1	0	0	0	3	3	1	1	4	8	12
	949	0	0	0	0	0	3	0	2	5	1	0	1	3	9	12
	950	0	1	2	0	1	0	2	0	0	0	2	0	4	4	8
	951	0	0	0	0	0	0	0	1	1	1	0	2	0	5	5
	952	0	0	0	0	0	0	0	0	0	0	4	5	0	9	9
	953	0	0	0	0	0	0	1	0	1	7	1	3	0	13	13
	954	0	1	1	0	0	0	0	2	13	30	26	22	2	93	95
	955	0	0	0	0	0	0	8	27	37	31	21	36	0	160	160
	956	0	0	0	0	0	0	59	47	23	21	73	3	0	226	226
	957	0	0	0	0	0	1	325	182	84	225	14	14	1	844	845
	958	0	0	0	1	0	0	26	18	60	14	10	9	1	137	138
	959	0	0	0	0	0	1	5	31	6	1	1	0	1	44	45
	960	0	0	0	0	0	0	6	1	1	1	0	0	0	9	9
	961	0	0	0	0	0	0	4	2	3	0	0	0	0	9	9
	962	0	0	0	0	0	0	1	1	0	0	0	0	0	2	2
	963	0	0	0	1	0	0	0	0	0	0	0	0	1	0	1
	964	0	0	0	0	0	0	0	2	2	1	0	0	0	5	5
	965	0	0	0	0	0	0	18	31	0	0	0	0	0	49	49
	966	0	0	0	0	0	0	0	0	0	0	0	0	0	0	0
	967	0	0	0	0	0	0	0	0	0	0	0	0	0	0	0
	968	0	0	0	0	0	0	0	0	0	0	0	0	0	0	0
	969	0	0	0	0	0	0	0	0	0	0	0	0	0	0	0
	970	0	0	0	0	0	0	0	0	0	0	0	0	0	0	0
	971	0	0	0	0	0	0	0	0	1	0	0	2	0	3	3
	972	0	35	1	0	0	0	0	0	0	0	0	0	36	0	36
	973	0	0	0	0	0	0	0	0	0	4	0	0	0	4	4
	974	0	0	0	0	0	0	0	0	0	0	0	0	0	0	0
	975	0	0	0	0	0	0	1	0	0	0	0	0	0	1	1
	976	0	0	0	0	0	0	0	0	0	0	0	0	0	0	0
	977	0	0	0	0	0	0	1	2	1	0	2	0	0	6	6
	978	0	0	0	1	0	0	0	0	0	0	0	4	1	4	5
	979	0	0	1	0	1	0	0	0	0	0	0	0	2	0	2
	980	0	0	1	0	0	2	0	1	2	3	10	3	3	19	22
	981	0	0	1	0	2	0	0	0	0	6	0	0	3	6	9
	982	0	2	1	1	1	1	1	0	0	0	0	3	6	4	10
	983	0	0	0	0	0	2	0	0	0	0	1	0	2	1	3
	984	0	0	0	0	0	0	0	0	0	0	0	0	0	0	0
	985	0	0	0	0	0	0	5	16	20	9	2	5	0	57	57
	986	0	1	4	0	0	1	4	10	7	0	0	0	6	21	27
	987	0	0	0	1	0	0	2	1	0	0	0	0	1	3	4
	988	1	0	1	0	0	0	3	1	0	0	0	0	2	4	6
	989	0	0	0	0	1	1	0	0	0	0	0	0	2	0	2
	990	0	0	1	0	0	0	1	0	0	2	0	0	1	3	4
	991	0	1	0	0	0	0	2	0	0	0	0	0	1	2	3
	992	0	0	0	0	0	0	1	0	0	0	0	0	0	1	1
	993	0	0	0	0	0	0	3	0	3	0	0	1	0	7	7
	994	0	0	0	0	0	0	1	9	1	1	1	0	0	13	13
	995	0	0	0	0	0	0	1	0	0	0	0	0	0	1	1
	996	0	0	0	0	0	0	0	0	1	0	0	0	0	1	1
	997	0	1	0	0	0	0	0	0	0	0	0	0	1	0	1
	998	0	0	0	0	0	0	1	0	0	0	0	0	0	1	1
	999	1	0	0	0	0	0	0	0	0	0	1	0	1	1	2
	1000	0	0	0	0	0	0	0	0	0	0	0	1	0	1	1
	1001	0	0	0	0	0	0	0	0	0	0	0	0	0	0	0
	1002	0	0	0	0	0	0	0	0	0	0	0	0	0	0	0
	1003	0	0	0	0	0	0	1	0	0	0	1	0	0	2	2
	1004	0	0	0	0	0	0	0	0	0	0	0	0	0	0	0
	1005	0	0	0	0	0	0	0	0	0	0	0	0	0	0	0
	1006	1	0	0	0	0	0	0	0	0	0	0	0	1	0	1
	1007	0	0	0	0	0	0	0	0	0	0	0	0	0	0	0
	1008	0	0	1	1	0	0	0	4	0	1	1	2	2	8	10
	1009	0	0	0	0	0	0	0	0	0	0	0	0	0	0	0
	1010	0	0	0	0	0	0	0	0	0	0	0	0	0	0	0
	1011	0	0	0	0	0	0	1	0	0	0	0	1	0	2	2
	1012	0	3	0	0	0	0	0	0	0	1	0	0	3	1	4
	1013	0	0	0	0	1	1	0	0	0	0	0	0	2	0	2
	1014	0	0	0	1	0	1	0	0	0	0	0	1	2	1	3
	1015	0	0	2	0	0	2	0	0	0	1	1	26	4	28	32
	1016	0	0	3	0	0	0	2	1	0	2	54	77	3	136	139
	1017	0	3	0	0	0	0	2	0	0	20	19	28	3	69	72
	1018	0	0	0	0	0	0	0	0	22	70	123	116	0	331	331
	1019	0	2	0	0	0	0	0	9	51	78	80	57	2	275	277
	1020	0	0	0	0	0	0	5	7	9	16	4	19	0	60	60
	1021	0	0	0	0	0	0	12	21	22	10	26	93	0	184	184
	1022	0	0	0	0	0	0	6	8	6	8	16	14	0	58	58
	1023	0	0	0	0	0	0	2	1	2	10	1	11	0	27	27
	1024	0	0	0	0	0	0	1	0	1	0	1	0	0	3	3
	1025	0	0	0	0	0	1	2	15	2	12	0	1	1	32	33
	1026	0	0	0	0	0	0	0	1	2	0	1	0	0	4	4
	1027	0	0	0	0	0	0	2	6	0	0	0	1	0	9	9
	1028	0	0	0	0	0	0	6	0	1	0	1	0	0	8	8
	1029	0	0	0	0	0	0	0	1	0	2	0	0	0	3	3
	1030	0	0	0	0	0	0	1	0	0	0	0	0	0	1	1
	1031	0	0	0	1	1	0	1	9	0	0	2	0	2	12	14
	1032	1	0	0	0	1	0	6	0	0	2	0	0	2	8	10
	1033	0	1	0	0	0	0	6	17	74	5	1	2	1	105	106
	1034	0	4	0	2	0	2	0	6	3	1	1	1	8	12	20
	1035	0	3	0	0	1	3	38	17	4	8	5	1	7	73	80
	1036	6	11	5	3	15	0	0	0	0	0	0	0	40	0	40
	1037	10	8	3	15	3	1	0	0	2	0	1	0	40	3	43
	1038	4	2	11	0	0	0	0	1	0	0	1	1	17	3	20
	1039	0	10	3	1	2	3	0	0	0	0	0	0	19	0	19
	1040	1	6	0	1	0	1	0	0	0	0	0	4	9	4	13
	1041	2	1	1	2	1	1	0	2	1	0	1	0	8	4	12
	1042	1	3	2	1	1	0	0	0	0	0	0	0	8	0	8
	1043	1	2	1	3	3	0	4	4	3	0	0	0	10	11	21
	1044	5	0	3	3	1	6	9	12	2	16	1	3	18	43	61
	1045	2	1	0	0	3	5	3	0	7	0	0	2	11	12	23
	1046	1	2	0	2	1	2	0	5	0	0	0	1	8	6	14
	1047	6	3	10	31	2	22	8	0	0	3	1	0	74	12	86
	1048	0	0	1	1	1	0	0	0	3	0	0	0	3	3	6
	1049	0	2	0	16	0	0	1	3	0	0	0	0	18	4	22
	1050	2	1	60	0	0	0	6	0	3	0	0	0	63	9	72
	1051	0	5	0	0	0	0	0	0	0	0	0	0	5	0	5
	1052	4	0	0	0	0	0	0	0	0	0	0	0	4	0	4
	1053	0	0	0	0	0	0	0	0	0	0	0	0	0	0	0
	1054	0	0	0	2	0	0	0	0	0	0	0	0	2	0	2
	1055	0	0	0	0	0	0	0	0	0	0	0	0	0	0	0
	1056	0	0	0	0	0	0	0	2	0	0	0	0	0	2	2
	1057	0	0	0	0	0	0	0	0	0	0	0	0	0	0	0
	1058	0	0	0	0	0	2	0	0	0	0	0	1	2	1	3
	1059	0	0	0	0	1	0	12	13	2	8	10	0	1	45	46
	1060	0	6	0	3	4	0	0	2	0	0	0	0	13	2	15
	1061	0	0	1	0	0	0	0	0	0	0	0	0	1	0	1
	1062	0	2	1	0	0	0	0	0	0	0	0	0	3	0	3
	1063	0	0	0	0	0	0	0	1	0	1	0	0	0	2	2
	1064	1	0	0	0	0	0	0	0	0	0	0	1	1	1	2
	1065	1	0	0	0	0	0	0	0	0	0	0	0	1	0	1
	1066	0	0	0	0	0	0	0	0	0	0	0	0	0	0	0
	1067	0	0	0	1	0	0	0	0	0	0	0	0	1	0	1
	1068	0	0	0	0	0	1	1	0	0	1	0	0	1	2	3
	1069	0	0	0	0	2	0	2	0	0	0	0	0	2	2	4
	1070	0	0	0	0	0	0	0	0	0	0	0	0	0	0	0
	1071	0	0	2	0	0	0	16	2	3	0	0	0	2	21	23
	1072	0	1	0	0	0	0	0	2	1	0	0	0	1	3	4
	1073	0	0	0	0	0	0	0	0	0	0	0	0	0	0	0
	1074	0	0	0	0	0	0	0	0	0	0	0	0	0	0	0
	1075	0	0	0	0	0	0	0	0	0	0	0	0	0	0	0
	1076	0	0	0	0	0	0	0	0	2	0	0	0	0	2	2
	1077	0	0	0	0	0	0	0	0	0	0	0	0	0	0	0
	1078	0	0	0	0	0	0	0	0	0	0	0	0	0	0	0
	1079	0	0	0	0	0	0	0	0	0	0	0	0	0	0	0
	1080	0	0	0	0	0	0	0	0	0	0	0	0	0	0	0
	1081	0	0	0	0	0	0	0	0	0	0	0	0	0	0	0
	1082	0	0	0	0	0	0	0	0	0	0	0	0	0	0	0
	1083	0	0	0	0	0	0	0	0	0	0	0	0	0	0	0
	1084	1	1	1	0	0	0	0	0	0	0	0	0	3	0	3
	1085	0	2	1	0	0	0	0	0	0	0	0	0	3	0	3
	1086	0	1	1	0	0	0	0	0	1	0	0	0	2	1	3
	1087	0	0	0	0	0	0	0	2	0	0	0	0	0	2	2
	1088	0	0	0	0	0	0	0	0	0	0	0	0	0	0	0
	1089	1	7	2	0	0	0	0	0	0	0	0	0	10	0	10
	1090	1	0	0	0	0	0	0	0	0	0	0	0	1	0	1
	1091	0	0	1	0	0	0	0	0	0	0	0	0	1	0	1
	1092	0	0	0	0	0	0	0	1	0	0	0	0	0	1	1
	1093	1	0	0	0	0	0	0	0	0	0	0	0	1	0	1
	1094	0	0	1	0	0	0	0	0	0	0	0	0	1	0	1
	1095	0	0	0	0	0	0	0	0	0	0	0	0	0	0	0
	1096	0	1	1	0	0	0	0	0	0	0	0	0	2	0	2
	1097	0	0	0	0	0	0	0	0	0	0	0	0	0	0	0
	1098	0	0	0	0	0	0	0	0	0	0	0	0	0	0	0
	1099	0	0	0	0	0	0	0	0	0	0	0	0	0	0	0
	1100	0	0	0	0	0	0	1	0	0	0	0	0	0	1	1
	1101	0	0	0	0	0	0	0	0	0	0	0	0	0	0	0
	1102	0	0	0	0	0	0	0	0	0	0	0	0	0	0	0
	1103	0	0	0	0	0	0	0	0	0	0	0	0	0	0	0
	1104	0	0	0	0	0	0	1	1	5	0	0	0	0	7	7
	1105	0	0	0	0	0	0	0	0	0	0	0	0	0	0	0
	1106	0	0	0	0	0	0	0	0	0	0	0	0	0	0	0
	1107	0	0	0	0	0	0	0	0	1	0	0	0	0	1	1
	1108	0	0	0	0	0	0	0	2	1	0	0	0	0	3	3
	1109	0	0	0	0	0	0	0	0	0	0	0	0	0	0	0
	1110	0	0	0	0	0	0	0	0	0	0	0	0	0	0	0
	1111	0	0	0	0	0	0	0	0	0	0	0	0	0	0	0
	1112	0	0	0	0	0	0	0	1	0	0	0	0	0	1	1
	1113	0	0	0	0	0	0	0	0	1	0	0	0	0	1	1
	1114	0	0	0	0	0	0	0	0	0	0	0	0	0	0	0
	1115	0	1	0	0	0	0	0	0	0	0	0	0	1	0	1
	1116	0	0	0	0	0	0	1	0	0	0	0	0	0	1	1
	1117	0	0	0	0	0	0	0	0	0	0	0	0	0	0	0
	1118	0	0	0	0	0	0	0	0	0	0	0	0	0	0	0
	1119	0	0	0	0	0	0	0	0	1	0	0	0	0	1	1
	1120	0	0	0	0	0	0	0	0	0	0	0	0	0	0	0
	1121	0	0	0	0	0	0	0	0	0	0	0	0	0	0	0
	1122	0	0	0	0	0	0	0	0	0	0	0	0	0	0	0
	1123	0	0	0	0	0	0	0	0	0	0	0	0	0	0	0
	1124	0	0	0	0	0	0	0	0	0	0	0	0	0	0	0
	1125	0	0	0	0	0	0	0	0	0	0	0	0	0	0	0
	1126	0	0	0	0	0	0	0	0	0	0	0	0	0	0	0
	1127	0	0	0	0	0	0	0	0	0	0	0	0	0	0	0
	1128	0	0	0	0	0	0	0	0	0	0	0	0	0	0	0
	1129	0	0	0	0	0	0	0	0	0	0	0	0	0	0	0
	1130	0	0	0	0	0	0	0	0	1	0	0	0	0	1	1
	1131	0	0	0	0	0	0	0	0	0	0	0	0	0	0	0
	1132	0	0	0	0	0	0	0	0	0	0	0	0	0	0	0
	1133	0	0	0	0	0	0	0	0	0	0	0	0	0	0	0
	1134	0	0	0	0	0	0	0	0	0	0	0	0	0	0	0
	1135	0	0	0	0	0	0	0	0	0	0	0	0	0	0	0
	1136	0	0	0	0	0	0	0	0	0	0	0	0	0	0	0
	1137	0	0	0	0	0	0	0	0	0	0	0	0	0	0	0
	1138	0	0	0	0	0	0	0	10	2	0	0	0	0	12	12
	1139	0	0	0	0	0	0	1	2	0	0	0	0	0	3	3
	1140	0	0	0	0	0	0	1	3	0	0	0	0	0	4	4
	1141	0	2	0	0	0	0	1	0	0	0	0	0	2	1	3
	1142	0	0	0	0	0	0	0	0	0	0	0	0	0	0	0
	1143	1	0	2	0	0	0	0	0	0	0	0	0	3	0	3
	1144	0	3	0	0	0	0	0	0	0	0	0	0	3	0	3
	1145	0	0	0	0	0	0	0	0	0	0	0	0	0	0	0
	1146	0	0	0	0	0	0	0	0	0	0	0	0	0	0	0
	1147	0	0	0	0	0	0	0	0	0	0	0	0	0	0	0
	1148	0	0	0	0	0	0	0	0	0	0	1	0	0	1	1
	1149	0	0	0	0	0	0	0	0	1	0	0	0	0	1	1
	1150	0	0	0	0	0	0	0	18	18	1	0	0	0	37	37
	1151	0	0	0	0	0	0	0	0	0	0	0	0	0	0	0
	1152	1	0	0	0	0	0	0	0	0	0	0	0	1	0	1
	1153	0	0	0	0	0	0	0	0	0	0	0	0	0	0	0
	1154	0	0	0	0	0	0	0	0	1	0	0	0	0	1	1
	1155	0	0	0	0	0	0	0	0	0	0	0	0	0	0	0
	1156	0	0	0	0	0	0	0	0	0	0	0	0	0	0	0
	1157	0	0	0	0	0	0	0	0	0	0	0	0	0	0	0
	1158	0	0	0	0	0	0	0	0	0	0	0	0	0	0	0
	1159	0	0	0	0	0	0	0	0	0	0	0	0	0	0	0
	1160	0	0	0	0	0	0	0	0	0	0	0	0	0	0	0
	1161	0	0	0	0	0	0	0	0	0	0	0	0	0	0	0
	1162	0	0	0	0	0	0	0	0	0	0	0	0	0	0	0
	1163	0	0	1	0	0	0	0	0	0	0	0	0	1	0	1
	1164	0	0	0	0	0	0	0	0	0	0	0	0	0	0	0
	1165	0	0	0	0	0	0	0	0	0	0	0	0	0	0	0
	1166	0	0	0	0	0	0	0	0	0	0	0	0	0	0	0
	1167	0	0	0	0	0	0	0	0	0	0	0	0	0	0	0
	1168	0	0	0	0	0	0	0	0	0	0	0	0	0	0	0
	1169	0	0	0	0	0	0	0	0	0	0	0	0	0	0	0
	1170	0	0	0	0	0	0	0	0	0	0	0	0	0	0	0
	1171	0	0	0	0	0	0	0	0	0	0	0	0	0	0	0
	1172	0	0	0	0	0	0	0	0	0	0	0	0	0	0	0
	1173	0	0	1	1	0	0	0	0	0	0	0	0	2	0	2
	1174	0	1	2	0	0	0	0	0	0	0	0	0	3	0	3
	1175	0	1	1	0	0	0	0	0	0	0	0	0	2	0	2
	1176	0	1	0	0	0	0	0	0	0	0	0	0	1	0	1
	1177	0	0	0	0	0	0	0	0	0	0	0	0	0	0	0
	1178	0	0	0	0	0	0	0	0	0	0	0	0	0	0	0
	1179	0	0	0	0	0	0	0	0	0	0	0	0	0	0	0
	1180	0	0	0	0	0	0	0	0	0	0	0	0	0	0	0
	1181	0	0	0	0	0	0	0	0	0	0	0	0	0	0	0
	1182	0	0	0	0	0	0	0	0	0	0	0	0	0	0	0
	1183	0	0	0	0	0	0	1	0	0	0	0	0	0	1	1
	1184	0	0	0	0	0	0	0	2	0	0	0	0	0	2	2
	1185	0	0	0	0	0	0	0	0	0	0	0	0	0	0	0
	1186	0	0	0	0	0	0	0	0	0	0	0	0	0	0	0
	1187	0	0	0	0	0	0	0	0	3	0	0	0	0	3	3
	1188	0	0	0	0	0	0	0	0	0	0	0	0	0	0	0
	1189	0	0	0	0	0	0	1	2	0	0	0	0	0	3	3
	1190	0	0	0	0	0	0	0	1	1	0	0	0	0	2	2
	1191	0	0	0	0	0	0	0	0	0	0	0	0	0	0	0
	1192	0	0	0	0	0	0	3	0	0	0	0	0	0	3	3
	1193	0	0	0	0	0	0	0	0	0	0	0	0	0	0	0
	1194	0	0	0	0	0	0	0	0	0	0	0	0	0	0	0
	1195	0	0	1	0	0	0	0	0	2	0	0	0	1	2	3
	1196	0	0	0	0	0	0	0	0	7	0	0	0	0	7	7
	1197	1	4	0	0	0	0	0	0	0	0	0	0	5	0	5
	1198	0	0	0	0	0	0	0	0	0	0	0	0	0	0	0
	1199	0	1	16	0	0	0	0	1	1	0	0	0	17	2	19
	1200	0	5	0	0	0	0	0	0	1	0	0	0	5	1	6
	1201	3	0	0	0	0	0	0	0	0	0	0	0	3	0	3
	1202	0	0	8	0	0	0	0	0	0	0	0	0	8	0	8
	1203	0	3	0	0	0	0	0	1	2	1	0	0	3	4	7
	1204	0	2	0	0	0	0	0	0	0	0	0	0	2	0	2
	1205	0	2	0	0	0	0	0	0	0	0	0	0	2	0	2
	1206	0	0	1	0	0	0	0	0	0	0	0	0	1	0	1
	1207	0	0	0	0	0	0	0	0	0	0	0	0	0	0	0
	1208	0	0	0	0	0	0	0	0	0	0	0	0	0	0	0
	1209	0	0	0	0	0	0	0	1	0	0	0	0	0	1	1
	1210	0	3	2	0	0	0	0	0	0	0	0	0	5	0	5
	1211	0	1	1	0	0	0	0	0	0	0	0	0	2	0	2
	1212	0	2	1	0	0	0	0	0	0	0	0	0	3	0	3
	1213	0	0	0	0	0	0	0	0	0	0	0	0	0	0	0
	1214	0	2	1	0	0	0	0	0	0	0	0	0	3	0	3
	1215	0	1	0	0	0	0	0	0	0	0	0	0	1	0	1
	1216	0	1	0	1	0	0	0	0	0	0	0	0	2	0	2
	1217	0	0	0	0	0	0	0	2	1	0	0	0	0	3	3
	1218	0	0	0	0	0	0	0	1	0	0	0	0	0	1	1
	1219	0	3	2	0	0	0	0	0	0	0	0	0	5	0	5
	1220	0	0	1	0	0	0	0	0	0	0	0	0	1	0	1
	1221	0	0	3	0	1	0	0	0	0	0	0	0	4	0	4
	1222	0	3	0	1	0	0	0	0	0	0	0	0	4	0	4
	1223	0	3	13	0	0	0	0	0	0	0	0	0	16	0	16
	1224	0	7	2	0	0	0	0	0	0	0	0	0	9	0	9
	1225	2	1	0	0	0	0	0	0	0	0	0	0	3	0	3
	1226	0	3	0	0	0	0	0	0	0	0	0	0	3	0	3
	1227	0	0	0	0	0	0	0	0	0	0	0	0	0	0	0
	1228	0	0	0	0	0	0	0	2	0	0	0	0	0	2	2
	1229	0	0	0	0	0	0	0	0	2	0	0	0	0	2	2
	1230	0	0	0	0	0	0	0	0	0	0	0	0	0	0	0
	1231	0	0	0	0	0	0	0	0	0	0	0	0	0	0	0
	1232	0	0	0	0	0	0	1	0	0	0	0	0	0	1	1
	1233	0	0	0	0	0	0	0	0	0	0	0	0	0	0	0
	1234	0	0	0	0	0	0	0	1	2	0	0	0	0	3	3
	1235	0	0	0	0	0	0	0	0	0	0	0	0	0	0	0
	1236	0	0	0	0	0	0	0	0	0	0	0	0	0	0	0
	1237	0	0	0	0	0	0	2	2	3	0	0	0	0	7	7
	1238	0	0	0	0	0	0	0	2	0	0	0	0	0	2	2
	1239	0	0	9	0	0	0	0	2	1	0	0	0	9	3	12
	1240	0	10	1	0	0	0	0	0	0	0	0	0	11	0	11
	1241	1	1	1	0	0	0	0	0	1	0	1	1	3	3	6
	1242	0	0	0	0	0	0	0	0	0	0	0	0	0	0	0
	1243	0	0	0	0	0	0	0	0	1	0	0	0	0	1	1
	1244	0	1	0	0	0	0	0	5	12	0	0	0	1	17	18
	1245	0	0	0	0	0	0	1	2	2	0	0	0	0	5	5
	1246	0	1	1	0	0	0	3	2	2	1	0	0	2	8	10
	1247	0	0	0	0	0	0	0	0	1	0	0	0	0	1	1
	1248	0	0	0	0	0	0	2	0	3	0	0	0	0	5	5
	1249	0	1	0	0	0	0	0	3	0	0	0	0	1	3	4
	1250	0	0	0	0	0	0	4	19	24	2	2	0	0	51	51
	1251	0	0	2	0	0	0	0	0	1	0	0	1	2	2	4
	1252	0	0	0	0	0	0	0	1	0	0	0	0	0	1	1
	1253	0	0	1	0	0	0	0	0	4	0	0	0	1	4	5
	1254	0	1	1	1	0	0	0	1	0	0	1	0	3	2	5
	1255	0	1	1	0	0	0	3	10	10	1	1	0	2	25	27
	1256	0	0	0	0	0	0	0	9	7	0	0	0	0	16	16
	1257	0	0	0	0	0	0	0	3	2	0	0	0	0	5	5
	1258	0	0	0	0	0	0	0	4	7	0	0	0	0	11	11
	1259	0	0	0	0	0	0	0	10	0	0	0	0	0	10	10
	1260	0	0	0	0	0	0	0	0	0	0	0	0	0	0	0
	1261	0	0	0	0	0	0	1	0	0	0	0	0	0	1	1
	1262	0	0	0	0	0	0	0	0	0	0	0	0	0	0	0
	1263	0	0	0	0	0	0	0	0	0	0	0	0	0	0	0
	1264	0	0	0	0	0	0	0	1	0	0	0	0	0	1	1
	1265	0	0	0	0	0	0	0	1	0	0	0	0	0	1	1
	1266	0	0	0	0	0	0	0	0	0	0	0	0	0	0	0
	1267	0	0	0	0	0	0	0	0	0	0	0	0	0	0	0
	1268	0	0	0	0	0	0	0	0	0	0	0	0	0	0	0
	1269	0	0	0	0	0	0	0	0	0	0	0	0	0	0	0
	1270	0	0	1	0	0	0	0	0	0	0	0	0	1	0	1
	1271	0	0	0	0	0	0	0	0	0	0	0	0	0	0	0
	1272	0	0	0	0	0	0	0	0	0	0	0	0	0	0	0
	1273	0	0	0	0	0	0	0	0	0	0	0	0	0	0	0
	1274	0	0	0	0	0	0	0	0	0	0	0	0	0	0	0
	1275	0	0	0	0	0	0	0	0	0	0	0	0	0	0	0
	1276	0	0	0	0	0	0	0	0	0	0	0	0	0	0	0
	1277	0	0	0	0	0	0	0	0	0	0	0	0	0	0	0
	1278	0	0	0	0	0	0	0	0	0	0	0	0	0	0	0
	1279	0	0	0	1	0	0	0	0	0	0	0	0	1	0	1
	1280	0	2	0	0	0	0	0	0	0	0	0	0	2	0	2
	1281	0	0	0	0	0	0	1	5	1	0	0	0	0	7	7
	1282	0	0	0	0	0	0	0	0	0	0	0	0	0	0	0
	1283	0	0	2	0	0	0	0	3	2	0	0	0	2	5	7
	1284	0	0	0	0	0	0	0	0	0	0	0	0	0	0	0
	1285	0	0	0	0	0	0	0	0	0	0	0	0	0	0	0
	1286	0	0	2	0	0	0	0	1	0	0	0	0	2	1	3
	1287	0	1	3	0	0	0	0	0	0	0	0	0	4	0	4
	1288	1	0	0	0	0	0	0	0	1	0	0	0	1	1	2
	1289	0	0	1	0	0	0	0	0	0	0	0	0	1	0	1
	1290	0	0	0	0	0	0	0	0	0	0	0	0	0	0	0
	1291	0	1	0	0	0	0	0	0	1	0	0	0	1	1	2
	1292	0	0	0	0	0	1	0	0	0	1	0	0	1	1	2
	1293	0	0	0	0	0	0	0	0	0	0	0	0	0	0	0
	1294	0	1	0	0	0	0	0	1	0	0	0	0	1	1	2
	1295	0	0	0	0	0	0	0	2	2	0	0	0	0	4	4
	1296	0	0	3	0	0	0	0	1	0	0	0	0	3	1	4
	1297	0	0	0	0	0	0	1	5	4	1	2	0	0	13	13
	1298	0	0	0	0	0	0	0	5	2	0	0	1	0	8	8
	1299	0	0	0	0	0	0	0	1	1	0	0	0	0	2	2
	1300	0	0	0	0	0	0	0	0	1	0	0	0	0	1	1
	1301	0	0	0	0	0	0	0	0	0	0	0	0	0	0	0
	1302	0	0	0	0	0	0	0	0	4	0	0	0	0	4	4
	1303	0	0	0	0	0	0	0	2	0	0	0	0	0	2	2
	1304	0	0	0	0	0	0	0	7	3	0	0	0	0	10	10
	1305	0	0	0	0	0	0	0	0	0	0	0	0	0	0	0
	1306	0	0	0	0	0	0	0	0	0	0	0	0	0	0	0
	1307	0	0	0	0	0	0	0	0	0	0	0	0	0	0	0
	1308	0	0	0	0	0	0	0	0	0	0	0	0	0	0	0
	1309	0	0	0	0	0	0	0	0	0	0	0	0	0	0	0
	1310	0	0	0	0	0	0	0	0	0	0	0	0	0	0	0
	1311	0	0	0	0	0	0	0	0	2	0	0	0	0	2	2
	1312	0	1	0	0	0	0	0	2	4	0	0	0	1	6	7
	1313	0	0	0	0	0	0	0	3	0	0	0	0	0	3	3
	1314	0	0	0	0	0	0	1	0	1	0	0	0	0	2	2
	1315	0	0	0	0	0	0	1	9	0	0	0	0	0	10	10
	1316	0	0	0	0	0	0	1	0	0	0	0	0	0	1	1
	1317	0	1	0	1	0	0	0	0	0	0	0	0	2	0	2
	1318	0	1	0	0	0	0	0	2	0	0	0	0	1	2	3
	1319	0	1	1	0	0	0	2	7	3	0	0	0	2	12	14
	1320	0	1	0	0	0	0	1	3	7	7	0	0	1	18	19
	1321	0	1	2	0	0	0	1	1	0	0	0	0	3	2	5
	1322	0	3	0	2	0	0	0	0	0	0	0	0	5	0	5
	1323	0	0	11	0	0	0	1	3	2	0	0	0	11	6	17
	1324	0	8	0	0	0	0	0	1	0	0	0	0	8	1	9
	1325	0	1	2	1	0	1	0	0	0	0	0	0	5	0	5
	1326	0	3	0	0	0	0	0	0	0	0	0	0	3	0	3
	1327	0	0	0	0	0	1	0	2	0	0	0	0	1	2	3
	1328	0	0	1	0	0	0	0	0	6	0	0	0	1	6	7
	1329	0	2	1	0	0	0	0	0	0	0	0	0	3	0	3
	1330	1	0	9	0	0	0	0	0	0	0	0	0	10	0	10
	1331	0	6	0	0	0	0	0	0	0	0	0	0	6	0	6
	1332	0	0	0	0	0	0	0	0	0	0	0	0	0	0	0
	1333	0	0	0	0	0	0	0	0	0	0	0	0	0	0	0
	1334	0	0	0	0	0	0	1	2	7	0	1	0	0	11	11
	1335	0	0	0	0	0	0	0	0	0	0	0	0	0	0	0
	1336	0	0	2	0	0	0	0	0	0	0	0	0	2	0	2
	1337	0	0	0	0	0	0	0	10	2	0	0	0	0	12	12
	1338	0	0	0	0	0	0	0	1	0	0	0	0	0	1	1
	1339	0	0	1	0	0	0	0	0	0	0	0	0	1	0	1
	1340	0	0	0	0	0	0	0	2	6	0	0	0	0	8	8
	1341	0	0	0	0	0	0	0	1	0	0	0	0	0	1	1
	1342	1	0	0	0	0	0	0	1	0	0	0	0	1	1	2
	1343	0	0	0	0	0	0	0	0	1	0	0	0	0	1	1
	1344	0	1	0	0	0	0	0	0	0	0	0	0	1	0	1
	1345	0	0	2	0	0	0	0	0	0	0	0	0	2	0	2
	1346	0	0	0	0	0	0	0	0	0	0	0	0	0	0	0
	1347	0	0	0	0	0	0	0	0	0	0	0	0	0	0	0
	1348	0	0	0	0	0	0	0	0	0	0	0	0	0	0	0
	1349	0	0	1	0	0	0	0	0	0	0	0	0	1	0	1
	1350	0	0	0	0	0	0	0	0	0	0	0	0	0	0	0
	1351	0	0	1	0	0	0	0	0	0	0	0	0	1	0	1
	1352	0	0	0	0	0	0	1	0	2	0	0	0	0	3	3
	1353	0	0	0	0	0	0	0	0	0	0	0	0	0	0	0
	1354	0	0	0	0	0	0	0	0	0	0	0	0	0	0	0
	1355	0	0	0	0	0	0	0	0	0	0	0	0	0	0	0
	1356	0	1	0	0	0	0	0	0	0	0	0	0	1	0	1
	1357	0	0	0	0	0	0	0	0	0	0	0	0	0	0	0
	1358	0	0	0	0	0	0	0	0	0	0	0	0	0	0	0
	1359	0	0	0	0	0	0	0	0	0	0	0	0	0	0	0
	1360	0	0	0	0	0	0	0	0	0	0	0	0	0	0	0
	1361	0	0	0	0	0	0	0	1	0	0	0	0	0	1	1
	1362	0	0	0	0	0	0	0	0	0	0	0	0	0	0	0
	1363	0	0	0	0	0	0	0	0	0	0	0	0	0	0	0
	1364	0	0	0	0	0	0	0	0	0	0	0	0	0	0	0
	1365	0	0	0	0	0	0	0	0	0	0	0	0	0	0	0
	1366	0	1	0	0	0	0	0	0	0	0	0	0	1	0	1
	1367	1	0	0	0	0	0	0	0	0	0	0	0	1	0	1
	1368	0	0	0	0	0	0	0	3	1	1	0	0	0	5	5
	1369	0	0	0	0	0	0	0	0	0	1	0	0	0	1	1
	1370	0	0	0	0	0	0	1	2	3	0	0	0	0	6	6
	1371	0	0	0	0	0	0	0	0	0	0	0	0	0	0	0
	1372	0	1	0	0	0	0	0	2	6	0	0	0	1	8	9
	1373	0	0	0	0	0	0	0	2	0	0	0	0	0	2	2
	1374	0	0	2	0	0	0	0	0	1	0	0	0	2	1	3
	1375	0	4	0	0	0	0	0	0	0	0	0	0	4	0	4
	1376	1	1	1	0	0	0	1	2	6	1	0	0	3	10	13
	1377	0	0	0	0	0	0	1	4	0	0	0	0	0	5	5
	1378	0	0	0	0	0	0	0	0	1	0	0	0	0	1	1
	1379	0	0	0	0	0	0	0	1	0	0	0	0	0	1	1
	1380	0	0	0	0	0	0	10	1	0	0	0	0	0	11	11
	1381	0	0	0	0	0	0	0	2	1	1	0	0	0	4	4
	1382	0	0	0	0	0	0	0	0	0	0	0	0	0	0	0
	1383	0	0	0	0	0	0	0	0	1	0	1	0	0	2	2
	1384	0	0	0	0	0	0	0	0	0	0	0	0	0	0	0
	1385	0	0	0	0	0	0	0	0	0	0	0	0	0	0	0
	1386	0	0	0	0	0	0	0	0	0	0	0	0	0	0	0
	1387	0	0	0	0	0	0	0	0	0	0	0	0	0	0	0
	1388	0	0	0	0	0	0	0	0	0	0	0	0	0	0	0
	1389	0	0	0	0	0	0	0	0	0	0	0	0	0	0	0
	1390	0	0	0	0	0	0	0	0	0	0	0	0	0	0	0
	1391	0	0	0	0	0	0	0	0	7	0	0	0	0	7	7
	1392	0	1	0	1	0	0	0	0	0	0	0	0	2	0	2
	1393	0	2	4	0	0	0	0	0	0	0	0	0	6	0	6
	1394	0	0	0	0	0	0	0	0	2	0	0	0	0	2	2
	1395	0	0	0	0	0	0	0	1	0	0	0	0	0	1	1
	1396	0	1	0	0	0	0	0	0	0	0	0	0	1	0	1
	1397	0	0	0	0	0	0	0	0	0	1	0	0	0	1	1
	1398	0	0	0	0	0	0	0	0	2	0	0	0	0	2	2
	1399	0	0	0	0	0	0	1	3	5	0	0	0	0	9	9
	1400	0	0	0	0	0	0	0	0	5	0	0	0	0	5	5
	1401	0	0	0	0	0	0	0	7	0	0	0	0	0	7	7
	1402	0	0	0	0	0	0	1	1	6	1	0	0	0	9	9
	1403	0	0	0	0	0	0	1	4	1	0	0	0	0	6	6
	1404	0	0	0	0	0	0	2	1	0	0	0	0	0	3	3
	1405	0	0	0	0	0	0	0	0	1	0	0	0	0	1	1
	1406	0	0	2	0	0	0	0	1	1	0	0	0	2	2	4
	1407	0	1	0	0	0	0	0	2	1	0	0	0	1	3	4
	1408	0	0	0	0	0	0	1	6	1	0	0	0	0	8	8
	1409	0	0	1	0	0	0	1	1	10	0	0	0	1	12	13
	1410	0	5	0	0	0	0	0	2	0	0	0	0	5	2	7
	1411	0	0	1	0	0	0	0	1	0	0	0	0	1	1	2
	1412	0	0	0	0	0	0	1	0	1	0	0	0	0	2	2
	1413	1	0	0	0	0	0	0	0	0	0	0	0	1	0	1
	1414	0	0	0	0	0	0	0	2	2	0	0	0	0	4	4
	1415	0	0	0	0	0	0	0	0	0	0	0	0	0	0	0
	1416	0	0	1	0	0	0	2	6	5	0	0	0	1	13	14
	1417	0	1	2	0	0	0	0	0	0	0	0	0	3	0	3
	1418	2	0	0	0	0	0	0	0	1	0	0	0	2	1	3
	1419	0	0	2	0	0	0	0	1	1	0	0	0	2	2	4
	1420	0	0	0	0	0	0	0	5	0	1	0	0	0	6	6
	1421	0	0	0	0	0	0	1	3	1	0	0	0	0	5	5
	1422	0	3	4	1	0	0	0	1	0	0	0	0	8	1	9
	1423	0	2	0	1	0	0	0	0	0	0	0	0	3	0	3
	1424	0	0	16	0	0	0	0	0	0	0	0	0	16	0	16
	1425	0	4	0	0	0	0	0	0	0	0	0	0	4	0	4
	1426	1	0	0	0	0	0	0	0	0	0	0	0	1	0	1
	1427	0	0	0	0	0	0	0	0	0	0	0	0	0	0	0
	1428	0	0	0	0	0	0	0	0	0	0	0	0	0	0	0
	1429	0	0	0	0	0	0	0	0	0	0	0	0	0	0	0
	1430	0	0	0	0	0	0	0	0	0	0	0	0	0	0	0
	1431	0	0	0	0	0	0	0	0	0	0	0	0	0	0	0
	1432	0	0	0	0	0	0	0	0	0	0	0	0	0	0	0
	1433	0	0	0	0	0	0	0	0	0	0	0	0	0	0	0
	1434	0	0	0	0	0	0	0	0	0	0	0	0	0	0	0
	1435	0	0	0	0	0	0	0	0	0	0	0	0	0	0	0
	1436	0	0	0	0	0	0	0	0	0	0	0	0	0	0	0
	1437	0	0	0	0	0	0	0	0	0	0	0	0	0	0	0
	1438	0	0	0	0	0	0	0	0	0	0	0	0	0	0	0
	1439	0	0	0	0	0	0	0	0	1	0	0	0	0	1	1
	1440	0	1	0	0	0	0	0	1	0	1	0	0	1	2	3
	1441	0	0	0	0	0	0	1	0	0	0	0	0	0	1	1
	1442	0	0	4	0	0	1	0	1	0	0	0	0	5	1	6
	1443	0	1	0	0	0	0	0	1	0	0	0	0	1	1	2
	1444	0	0	0	0	0	0	0	0	0	0	0	0	0	0	0
	1445	0	0	3	0	0	0	0	0	0	0	0	0	3	0	3
	1446	0	2	7	0	0	0	0	1	5	0	0	0	9	6	15
	1447	0	2	0	0	0	0	0	8	8	0	0	0	2	16	18
	1448	0	0	1	0	0	0	1	0	0	0	0	0	1	1	2
	1449	0	1	8	0	0	0	0	0	0	0	0	0	9	0	9
	1450	0	0	0	0	0	0	0	0	0	0	0	0	0	0	0
	1451	0	0	0	0	0	0	0	0	0	0	0	0	0	0	0
	1452	0	0	0	0	0	0	0	5	0	1	1	0	0	7	7
	1453	0	0	2	0	0	0	0	0	0	0	0	0	2	0	2
	1454	0	0	0	0	0	0	0	0	0	0	0	0	0	0	0
	1455	0	0	0	0	0	0	2	2	0	1	0	0	0	5	5
	1456	0	0	1	0	0	0	0	0	0	0	0	0	1	0	1
	1457	0	0	3	0	0	0	0	0	0	0	0	0	3	0	3
	1458	1	0	1	0	0	0	0	0	0	0	0	0	2	0	2
	1459	0	0	1	0	0	1	0	0	0	0	0	0	2	0	2
	1460	0	0	1	0	1	0	0	0	0	0	0	0	2	0	2
	1461	0	1	3	0	0	0	0	0	0	0	0	0	4	0	4
	1462	0	3	1	0	0	0	0	0	0	0	0	0	4	0	4
	1463	0	0	0	0	0	0	0	0	0	0	0	0	0	0	0
	1464	0	0	0	0	0	0	0	0	0	0	0	0	0	0	0
	1465	0	0	0	0	0	0	0	0	0	0	0	0	0	0	0
	1466	0	0	0	0	0	0	0	0	0	0	0	0	0	0	0
	1467	0	0	0	0	0	0	0	0	0	0	0	0	0	0	0
	1468	0	0	0	0	0	0	0	0	0	0	0	0	0	0	0
	1469	0	0	0	1	0	0	0	0	0	0	0	0	1	0	1
	1470	0	1	0	0	0	0	0	0	0	0	0	0	1	0	1
	1471	0	0	0	0	0	0	0	0	0	0	0	0	0	0	0
	1472	0	0	0	0	0	0	0	0	0	0	0	0	0	0	0
	1473	0	0	0	0	0	0	0	1	1	0	0	0	0	2	2
	1474	0	0	0	0	0	0	0	0	0	0	0	0	0	0	0
	1475	0	0	0	0	0	0	0	6	0	0	0	0	0	6	6
	1476	0	0	1	0	0	0	0	0	1	0	0	0	1	1	2
	1477	0	6	0	0	0	0	0	0	0	0	0	0	6	0	6
	1478	0	0	0	0	0	0	0	0	0	0	0	0	0	0	0
	1479	0	0	0	0	0	0	0	0	2	1	0	0	0	3	3
	1480	0	0	0	0	0	0	0	0	0	0	1	0	0	1	1
	1481	0	0	0	0	0	0	0	0	0	0	0	0	0	0	0
	1482	0	0	0	0	0	0	0	1	2	0	0	0	0	3	3
	1483	0	0	4	0	0	0	0	3	1	0	0	0	4	4	8
	1484	0	0	0	0	0	0	0	1	0	0	0	0	0	1	1
	1485	0	0	0	0	0	0	0	0	0	0	0	0	0	0	0
	1486	1	0	0	0	0	0	0	0	0	0	0	0	1	0	1
	1487	0	0	0	0	0	0	0	0	2	0	0	0	0	2	2
	1488	0	0	0	0	0	0	0	0	0	0	0	0	0	0	0
	1489	0	0	0	0	0	0	0	1	1	0	0	0	0	2	2
	1490	0	0	0	0	0	1	0	0	0	0	0	0	1	0	1
	1491	0	0	1	0	0	0	0	0	0	0	0	0	1	0	1
	1492	0	0	0	0	0	0	0	0	0	0	0	0	0	0	0
	1493	0	0	0	1	0	0	0	0	1	0	0	0	1	1	2
	1494	0	0	1	0	0	0	0	0	0	0	0	0	1	0	1
	1495	0	1	0	0	0	0	0	0	0	0	0	0	1	0	1
	1496	0	0	0	0	0	0	0	0	0	0	0	0	0	0	0
	1497	0	0	0	0	0	0	0	0	0	0	0	0	0	0	0
	1498	0	2	0	0	0	0	0	0	0	0	0	0	2	0	2
	1499	0	0	0	0	0	0	0	0	0	0	0	0	0	0	0
	1500	0	0	0	0	0	0	0	0	0	0	0	0	0	0	0
	1501	0	0	0	0	0	0	0	0	0	0	0	0	0	0	0
	1502	0	0	0	0	0	0	0	0	0	0	0	0	0	0	0
	1503	0	0	0	0	0	0	0	0	0	0	0	0	0	0	0
	1504	0	0	0	0	0	0	0	0	1	0	0	0	0	1	1
	1505	0	0	0	0	0	0	0	0	0	0	0	0	0	0	0
	1506	0	0	3	0	0	0	0	0	0	0	0	0	3	0	3
	1507	0	8	0	0	0	0	0	0	0	0	0	0	8	0	8
	1508	0	0	0	0	0	0	0	0	0	0	0	0	0	0	0
	1509	0	0	0	0	0	0	0	0	0	0	0	0	0	0	0
	1510	0	0	0	0	0	0	0	0	0	0	0	0	0	0	0
	1511	0	1	0	0	0	0	0	0	0	0	0	0	1	0	1
	1512	0	0	1	0	0	0	1	4	0	0	0	0	1	5	6
	1513	0	0	0	0	0	0	0	0	0	0	0	0	0	0	0
	1514	0	1	0	0	0	0	0	0	0	0	0	0	1	0	1
	1515	0	0	0	0	0	0	0	0	0	0	0	0	0	0	0
	1516	0	0	2	0	0	0	0	0	0	0	0	0	2	0	2
	1517	0	1	0	0	0	0	0	0	0	0	0	0	1	0	1
	1518	0	1	0	0	0	0	0	0	0	0	0	0	1	0	1
	1519	0	0	0	0	0	0	0	0	0	0	0	0	0	0	0
	1520	0	1	1	1	0	0	0	0	0	0	0	0	3	0	3
	1521	0	0	0	0	0	0	0	0	0	0	0	0	0	0	0
	1522	0	0	1	0	0	0	0	1	0	0	0	0	1	1	2
	1523	0	0	0	0	0	0	0	0	0	0	0	0	0	0	0
	1524	0	0	0	0	0	0	0	0	0	0	0	0	0	0	0
	1525	0	1	0	0	0	0	0	0	0	0	0	0	1	0	1
	1526	0	0	0	0	0	0	0	0	0	0	0	0	0	0	0
	1527	0	0	0	0	0	0	0	0	0	0	0	0	0	0	0
	1528	0	0	0	0	0	0	0	0	0	0	0	0	0	0	0
	1529	0	0	1	0	0	0	0	0	0	0	0	0	1	0	1
	1530	0	1	0	0	0	0	0	0	0	0	0	0	1	0	1
	1531	2	0	0	0	0	0	0	0	0	0	0	0	2	0	2
	1532	0	0	0	0	0	0	0	0	0	0	0	0	0	0	0
	1533	0	0	0	0	0	0	0	0	0	0	0	0	0	0	0
	1534	0	0	0	0	0	0	0	0	0	0	0	0	0	0	0
	1535	0	0	0	0	0	0	0	0	0	0	0	0	0	0	0
	1536	0	0	0	0	0	0	0	0	0	0	0	0	0	0	0
	1537	0	0	0	0	0	0	0	0	0	0	0	0	0	0	0
	1538	0	0	0	0	0	0	0	0	0	0	0	0	0	0	0
	1539	0	0	0	0	0	0	0	0	0	0	0	0	0	0	0
	1540	0	1	0	0	0	0	0	0	0	0	0	0	1	0	1
	1541	0	0	0	0	0	0	0	0	0	0	0	0	0	0	0
	1542	0	0	0	0	0	0	0	0	0	0	0	0	0	0	0
	1543	0	0	0	0	0	0	0	0	0	0	0	0	0	0	0
	1544	0	0	0	0	0	0	0	0	1	0	0	0	0	1	1
	1545	0	0	0	0	0	0	0	0	0	0	0	0	0	0	0
	1546	0	0	0	0	0	0	0	0	0	0	0	0	0	0	0
	1547	0	0	0	0	0	0	0	0	1	0	0	0	0	1	1
	1548	0	0	0	0	0	0	0	0	0	0	0	0	0	0	0
	1549	0	0	0	0	0	0	0	0	0	0	0	0	0	0	0
	1550	0	0	0	0	0	0	1	0	0	0	0	0	0	1	1
	1551	0	0	0	0	0	0	0	0	0	0	0	0	0	0	0
	1552	0	0	0	0	0	0	0	0	0	0	0	0	0	0	0
	1553	0	0	0	0	0	0	0	0	0	0	0	0	0	0	0
	1554	0	0	0	0	0	0	0	0	0	0	0	0	0	0	0
	1555	0	0	0	0	0	0	0	0	0	0	0	0	0	0	0
	1556	0	0	0	0	0	0	0	0	0	0	0	0	0	0	0
	1557	0	0	0	0	0	0	0	0	0	0	0	0	0	0	0
	1558	0	0	0	0	0	0	0	0	0	0	0	0	0	0	0
	1559	0	0	0	0	0	0	1	0	1	0	0	0	0	2	2
	1560	0	8	5	10	2	0	0	2	2	0	0	0	25	4	29
	1561	0	0	10	2	0	0	0	0	0	0	0	0	12	0	12
	1562	0	2	5	0	0	0	0	0	0	0	0	0	7	0	7
	1563	0	3	3	0	0	0	0	0	0	0	0	0	6	0	6
	1564	0	0	3	0	0	0	0	0	0	0	0	0	3	0	3
	1565	0	0	3	0	0	0	0	0	0	0	0	0	3	0	3
	1566	1	11	11	0	1	0	1	0	2	0	0	0	24	3	27
	1567	0	14	1	0	0	0	0	0	2	0	0	0	15	2	17
	1568	3	5	1	0	1	0	0	4	8	0	1	1	10	14	24
	1569	2	0	0	0	0	0	0	1	0	0	0	0	2	1	3
	1570	1	1	9	0	0	0	1	1	0	0	0	0	11	2	13
	1571	0	4	0	0	0	0	0	0	0	0	0	0	4	0	4
	1572	0	0	0	0	0	0	3	0	0	0	0	0	0	3	3
	1573	0	0	0	0	0	0	0	4	2	0	0	0	0	6	6
	1574	0	0	0	0	0	0	0	0	0	0	0	0	0	0	0
	1575	0	0	0	0	0	0	0	0	0	0	0	0	0	0	0
	1576	2	0	0	0	0	0	0	0	0	0	0	0	2	0	2
	1577	0	0	0	0	0	0	0	0	1	0	0	0	0	1	1
	1578	0	0	0	0	0	0	0	0	0	0	0	0	0	0	0
	1579	0	0	0	0	0	0	0	1	0	0	0	1	0	2	2
	1580	0	0	0	0	0	0	1	0	2	0	0	0	0	3	3
	1581	0	0	0	0	0	0	1	4	0	0	0	0	0	5	5
	1582	0	0	0	0	0	0	1	2	0	0	0	0	0	3	3
	1583	0	0	0	0	0	0	0	3	16	1	0	0	0	20	20
	1584	0	0	0	0	0	0	0	3	5	0	1	0	0	9	9
	1585	0	0	0	0	0	0	0	0	9	0	0	0	0	9	9
	1586	0	0	0	0	0	0	0	2	0	0	0	0	0	2	2
	1587	0	0	1	0	0	0	0	0	5	0	2	0	1	7	8
	1588	0	2	0	0	0	0	0	3	24	0	0	0	2	27	29
	1589	1	1	5	0	0	0	0	9	0	0	0	0	7	9	16
	1590	0	1	0	0	0	0	3	0	0	0	0	0	1	3	4
	1591	0	1	0	0	0	0	0	0	0	0	0	0	1	0	1
	1592	1	0	0	0	0	0	0	0	1	0	0	0	1	1	2
	1593	0	0	0	0	0	0	0	4	0	0	0	0	0	4	4
	1594	0	0	1	0	0	0	0	0	0	0	0	0	1	0	1
	1595	0	1	0	0	0	0	0	0	0	0	0	0	1	0	1
	1596	0	0	0	0	0	0	0	0	4	0	0	0	0	4	4
	1597	0	0	0	0	0	0	0	0	0	0	0	0	0	0	0
	1598	0	0	0	0	0	0	0	2	5	0	0	0	0	7	7
	1599	0	0	0	0	0	0	0	1	10	1	0	0	0	12	12
	1600	0	0	0	0	0	0	0	0	0	0	0	0	0	0	0
	1601	0	1	0	0	0	0	4	17	8	0	0	0	1	29	30
	1602	0	0	0	0	0	0	1	0	3	0	1	0	0	5	5
	1603	0	0	1	0	0	0	1	0	0	0	0	0	1	1	2
	1604	0	0	0	0	0	0	0	1	1	0	0	0	0	2	2
	1605	0	0	0	0	0	0	0	3	11	1	0	0	0	15	15
	1606	0	0	0	1	0	0	1	3	7	0	0	0	1	11	12
	1607	0	0	36	0	0	0	0	0	1	0	0	0	36	1	37
	1608	0	11	0	0	0	0	0	0	0	0	0	0	11	0	11
	1609	3	0	0	0	0	0	0	0	0	0	0	0	3	0	3
	1610	0	0	1	1	0	0	0	0	0	0	0	0	2	0	2
	1611	0	0	1	0	0	0	0	1	1	0	0	0	1	2	3
	1612	0	20	1	0	0	0	0	0	0	0	0	0	21	0	21
	1613	0	2	4	0	0	0	0	0	0	0	0	0	6	0	6
	1614	0	1	0	0	0	0	0	0	0	0	0	0	1	0	1
	1615	0	0	0	0	0	0	0	0	0	0	0	0	0	0	0
	1616	0	0	0	0	0	0	0	0	0	0	0	0	0	0	0
	1617	0	0	0	0	0	0	0	0	0	0	0	0	0	0	0
	1618	0	0	0	0	0	0	0	0	0	0	0	0	0	0	0
	1619	0	0	0	0	0	0	0	1	0	0	0	0	0	1	1
	1620	0	0	0	0	0	0	0	1	0	0	0	0	0	1	1
	1621	0	0	0	0	0	0	0	1	1	0	0	0	0	2	2
	1622	0	0	0	0	0	0	2	2	4	0	0	0	0	8	8
	1623	0	0	2	2	1	0	0	1	1	0	0	0	5	2	7
	1624	0	0	29	0	0	0	0	0	1	0	0	0	29	1	30
	1625	1	8	0	0	0	0	0	0	0	0	0	0	9	0	9
	1626	0	13	23	0	0	0	0	0	0	0	0	0	36	0	36
	1627	2	4	2	0	0	0	0	0	0	0	0	0	8	0	8
	1628	1	1	1	0	0	0	0	0	0	0	0	0	3	0	3
	1629	0	1	0	0	0	2	0	0	0	0	0	0	3	0	3
	1630	0	2	0	0	0	0	0	0	0	0	0	0	2	0	2
	1631	0	0	0	0	0	0	0	0	0	0	0	0	0	0	0
	1632	0	0	0	0	0	1	0	1	0	0	0	0	1	1	2
	1633	0	0	0	0	0	0	0	0	0	0	0	0	0	0	0
	1634	0	0	2	0	0	0	0	0	0	0	0	0	2	0	2
	1635	0	0	1	0	0	0	0	0	0	0	0	0	1	0	1
	1636	0	0	0	0	0	0	0	0	0	0	0	0	0	0	0
	1637	0	0	0	0	0	0	0	0	0	0	0	0	0	0	0
	1638	0	0	0	0	0	0	0	0	0	0	0	0	0	0	0
	1639	0	0	0	0	0	0	0	0	1	0	0	0	0	1	1
	1640	0	0	0	0	0	0	0	0	0	0	0	0	0	0	0
	1641	0	0	0	0	0	0	0	0	0	0	0	0	0	0	0
	1642	0	0	0	0	0	0	0	0	0	0	0	0	0	0	0
	1643	0	0	0	0	0	0	0	0	2	1	0	0	0	3	3
	1644	0	0	0	1	1	1	0	3	3	0	0	0	3	6	9
	1645	0	1	5	1	0	0	0	2	1	0	0	0	7	3	10
	1646	0	7	14	0	0	0	0	2	0	0	0	0	21	2	23
	1647	0	6	8	0	1	2	0	0	0	0	0	0	17	0	17
	1648	1	5	0	0	1	0	0	0	0	0	0	0	7	0	7
	1649	0	0	0	0	0	0	0	0	0	0	0	0	0	0	0
	1650	0	0	2	0	0	0	0	1	0	0	0	0	2	1	3
	1651	0	13	2	0	0	0	0	1	1	0	0	0	15	2	17
	1652	4	13	9	1	0	0	0	3	1	0	0	0	27	4	31
	1653	0	4	11	0	0	1	1	6	3	0	0	0	16	10	26
	1654	0	17	0	0	0	1	0	0	1	0	0	0	18	1	19
	1655	1	0	0	0	0	0	0	0	0	0	0	0	1	0	1
	1656	0	0	2	0	0	1	0	0	0	0	0	0	3	0	3
	1657	0	0	3	3	1	1	0	0	0	0	0	0	8	0	8
	1658	0	0	8	1	0	0	0	0	0	0	0	0	9	0	9
	1659	1	24	63	0	2	0	0	0	0	0	0	0	90	0	90
	1660	2	23	2	1	0	0	0	0	0	0	0	0	28	0	28
	1661	5	0	10	0	0	0	0	0	1	0	0	0	15	1	16
	1662	0	3	0	0	0	0	0	0	0	0	0	0	3	0	3
	1663	2	0	6	0	0	0	0	0	0	0	0	0	8	0	8
	1664	0	0	0	0	0	0	0	0	0	0	0	0	0	0	0
	1665	1	0	0	0	0	0	0	0	0	0	0	0	1	0	1
	1666	0	0	0	0	0	0	0	0	0	0	0	0	0	0	0
	1667	0	0	5	1	2	0	0	0	0	0	0	0	8	0	8
	1668	1	3	2	0	0	0	0	0	0	0	0	0	6	0	6
	1669	0	1	0	0	0	0	0	0	0	0	0	0	1	0	1
	1670	4	0	0	0	0	0	0	0	0	0	0	0	4	0	4
	1671	0	0	0	0	0	0	0	0	0	0	0	0	0	0	0
	1672	0	0	0	0	0	0	0	0	0	0	0	0	0	0	0
	1673	0	5	20	0	0	0	0	0	0	0	0	0	25	0	25
	1674	0	3	0	0	0	0	0	0	0	0	0	0	3	0	3
	1675	0	0	0	0	0	0	0	0	4	0	0	0	0	4	4
	1676	0	0	0	0	0	0	0	1	0	0	0	0	0	1	1
	1677	0	0	2	0	0	0	0	0	0	0	0	0	2	0	2
	1678	0	9	16	1	0	0	0	0	0	0	0	0	26	0	26
	1679	3	7	6	0	0	0	0	0	0	0	0	0	16	0	16
	1680	0	4	0	0	0	0	0	0	0	0	0	0	4	0	4
	1681	2	1	0	0	0	0	1	1	0	0	0	0	3	2	5
	1682	0	0	1	0	0	0	0	0	0	0	0	0	1	0	1
	1683	0	0	1	0	0	0	0	0	0	0	0	0	1	0	1
	1684	0	0	0	0	0	0	0	0	0	0	0	0	0	0	0
	1685	0	0	0	0	0	0	0	0	0	0	0	0	0	0	0
	1686	0	0	0	0	0	0	0	0	0	0	0	0	0	0	0
	1687	0	0	0	0	0	0	0	0	0	0	0	0	0	0	0
	1688	0	0	0	0	0	0	0	1	0	0	0	0	0	1	1
	1689	0	0	0	0	0	0	0	0	0	0	0	0	0	0	0
	1690	0	0	0	1	0	0	0	0	0	0	0	0	1	0	1
	1691	0	0	0	0	0	0	0	0	0	0	0	0	0	0	0
	1692	0	0	0	0	0	0	1	0	0	0	0	0	0	1	1
	1693	0	0	0	0	0	0	0	0	0	0	0	0	0	0	0
	1694	0	0	0	0	0	0	0	0	0	0	0	0	0	0	0
	1695	0	0	0	0	0	0	0	1	0	0	0	0	0	1	1
	1696	0	0	0	0	0	0	0	0	0	0	0	0	0	0	0
	1697	0	0	0	0	0	0	0	0	0	0	0	0	0	0	0
	1698	0	0	0	0	0	0	0	0	0	0	0	0	0	0	0
	1699	0	0	0	0	0	0	0	0	0	0	0	0	0	0	0
	1700	0	0	0	0	0	0	0	0	0	0	0	0	0	0	0
	1701	0	0	0	0	0	0	0	0	0	0	0	0	0	0	0
	1702	0	0	0	0	0	0	0	0	0	0	0	0	0	0	0
	1703	0	1	0	0	0	0	0	0	0	1	0	0	1	1	2
	1704	0	0	0	0	0	0	0	0	0	0	0	0	0	0	0
	1705	0	0	1	0	0	0	0	0	0	0	0	0	1	0	1
	1706	0	0	0	0	0	0	0	0	0	0	0	0	0	0	0
	1707	0	0	0	0	0	0	0	0	0	0	0	0	0	0	0
	1708	0	0	0	0	0	0	0	0	0	0	0	0	0	0	0
	1709	0	0	0	0	0	0	0	0	0	0	0	0	0	0	0
	1710	0	0	1	0	0	0	0	0	0	0	0	0	1	0	1
	1711	0	0	2	0	0	0	0	0	0	0	0	0	2	0	2
	1712	0	0	0	0	0	0	0	0	0	0	0	0	0	0	0
	1713	0	1	0	0	0	0	0	0	0	0	0	0	1	0	1
	1714	0	0	0	0	0	0	0	0	0	0	0	0	0	0	0
	1715	0	0	0	0	0	0	0	0	1	0	0	0	0	1	1
	1716	0	0	0	0	0	0	0	0	0	0	0	0	0	0	0
	1717	0	0	0	0	0	0	1	0	0	0	0	0	0	1	1
	1718	0	1	0	0	0	0	0	0	0	0	0	0	1	0	1
	1719	0	0	0	0	0	0	0	0	0	0	0	0	0	0	0
	1720	0	0	0	0	0	0	0	0	0	0	0	0	0	0	0
	1721	0	0	0	0	0	0	0	0	0	0	0	0	0	0	0
	1722	0	1	0	0	0	0	0	0	0	0	0	0	1	0	1
	1723	0	0	0	0	0	0	0	0	0	0	0	0	0	0	0
	1724	0	4	3	0	0	0	0	0	0	0	0	0	7	0	7
	1725	0	4	1	0	0	0	0	0	0	0	0	0	5	0	5
	1726	0	1	8	0	0	0	0	0	0	0	0	0	9	0	9
	1727	0	0	0	0	0	0	0	0	0	0	0	0	0	0	0
	1728	0	0	0	0	0	0	0	0	0	0	0	0	0	0	0
	1729	0	0	0	0	0	0	0	0	0	0	0	0	0	0	0
	1730	0	0	0	0	0	0	0	0	0	0	3	0	0	3	3
	1731	0	0	0	0	0	0	0	0	0	0	0	0	0	0	0
	1732	0	0	0	0	0	0	0	0	1	0	0	0	0	1	1
	1733	0	0	0	0	0	0	1	1	1	0	0	0	0	3	3
	1734	0	0	0	0	0	0	0	0	0	0	0	0	0	0	0
	1735	0	0	0	0	0	0	0	1	0	0	1	0	0	2	2
	1736	0	0	0	0	0	0	0	0	0	0	0	0	0	0	0
	1737	0	0	0	0	0	0	0	0	0	0	0	0	0	0	0
	1738	0	0	0	0	0	0	0	1	0	0	0	0	0	1	1
	1739	0	0	0	0	0	0	0	0	0	0	0	0	0	0	0
	1740	0	0	0	0	1	0	0	1	7	3	2	0	1	13	14
	1741	0	0	0	0	0	0	1	9	41	1	0	0	0	52	52
	1742	0	0	10	0	0	0	5	3	6	1	0	0	10	15	25
	1743	1	7	0	0	0	0	0	16	4	0	0	0	8	20	28
	1744	2	0	0	0	0	1	1	7	5	1	0	0	3	14	17
	1745	0	0	0	0	0	0	3	9	13	0	1	0	0	26	26
	1746	0	0	0	0	0	0	1	1	9	2	6	0	0	19	19
	1747	0	0	0	0	0	0	1	9	11	3	1	0	0	25	25
	1748	0	0	0	0	0	0	4	12	6	1	0	0	0	23	23
	1749	0	0	0	0	0	0	1	7	2	0	0	0	0	10	10
	1750	0	0	0	0	1	0	1	4	0	0	0	0	1	5	6
	1751	0	2	0	0	0	0	0	0	0	0	0	0	2	0	2
	1752	1	1	3	0	0	0	0	0	0	0	0	0	5	0	5
	1753	0	1	2	0	0	0	0	0	0	0	0	0	3	0	3
	1754	2	4	0	0	0	1	0	0	0	0	0	0	7	0	7
	1755	1	7	1	0	0	0	0	0	1	0	0	0	9	1	10
	1756	1	3	1	2	0	0	0	0	2	0	0	0	7	2	9
	1757	0	1	5	1	0	0	0	0	1	0	1	0	7	2	9
	1758	0	8	1	0	0	0	0	0	1	0	0	0	9	1	10
	1759	1	5	1	0	0	0	1	0	0	0	0	0	7	1	8
	1760	2	1	1	0	0	0	0	3	2	0	0	0	4	5	9
	1761	0	1	0	1	0	0	0	1	0	0	0	0	2	1	3
	1762	0	0	0	0	0	0	0	2	1	0	0	0	0	3	3
	1763	0	1	0	0	0	0	0	0	0	0	0	0	1	0	1
	1764	0	3	0	1	0	0	0	0	0	1	0	0	4	1	5
	1765	0	0	0	0	0	0	0	0	0	0	0	0	0	0	0
	1766	0	0	0	1	0	0	0	3	0	0	0	0	1	3	4
	1767	0	2	2	0	0	0	1	3	6	0	0	0	4	10	14
	1768	0	0	0	0	0	0	0	7	4	0	0	0	0	11	11
	1769	0	3	1	0	0	0	5	6	3	0	0	0	4	14	18
	1770	0	0	0	0	0	0	0	0	0	0	0	0	0	0	0
	1771	0	0	0	0	0	0	7	10	17	0	2	0	0	36	36
	1772	0	0	0	1	0	0	0	0	0	0	0	0	1	0	1
	1773	0	2	2	0	0	0	0	0	0	0	0	0	4	0	4
	1774	0	0	0	0	0	0	0	0	0	0	0	0	0	0	0
	1775	0	1	1	0	0	0	0	0	0	0	0	0	2	0	2
	1776	0	0	0	0	0	0	0	0	2	0	0	0	0	2	2
	1777	0	0	0	0	0	0	0	0	0	0	0	0	0	0	0
	1778	0	0	0	0	0	0	0	0	0	0	0	0	0	0	0
	1779	0	0	0	0	0	0	0	0	0	0	0	0	0	0	0
	1780	0	0	0	0	0	0	0	0	0	0	0	0	0	0	0
	1781	0	0	1	0	0	0	0	0	0	0	0	0	1	0	1
	1782	0	0	1	0	0	0	0	0	0	0	0	0	1	0	1
	1783	0	0	0	0	0	0	0	0	0	0	0	0	0	0	0
	1784	0	0	0	0	0	0	0	0	0	0	0	0	0	0	0
	1785	0	0	0	0	0	0	0	0	1	0	0	0	0	1	1
	1786	0	0	0	0	0	0	0	1	0	0	0	0	0	1	1
	1787	0	0	0	0	0	0	0	0	0	0	0	0	0	0	0
	1788	0	0	0	0	0	0	0	0	0	0	0	0	0	0	0
	1789	0	0	0	0	0	0	0	0	0	0	0	0	0	0	0
	1790	0	0	0	0	0	0	0	0	0	0	0	0	0	0	0
	1791	0	0	0	0	0	0	0	0	0	0	0	0	0	0	0
	1792	0	0	0	0	0	0	0	0	0	0	0	0	0	0	0
	1793	0	0	0	0	0	0	0	0	0	0	0	0	0	0	0
	1794	0	0	0	0	0	0	0	3	1	0	0	0	0	4	4
	1795	0	0	0	0	0	0	0	0	0	0	0	0	0	0	0
	1796	0	0	0	0	0	0	0	0	0	0	0	0	0	0	0
	1797	0	0	0	0	0	0	0	0	0	0	0	0	0	0	0
	1798	0	0	0	0	0	0	0	0	0	0	0	0	0	0	0
	1799	0	0	0	0	0	0	0	0	0	0	0	0	0	0	0
	1800	0	0	0	0	0	0	0	0	0	0	0	0	0	0	0
	1801	0	0	0	0	0	0	0	0	0	0	0	0	0	0	0
	1802	0	0	0	0	0	0	0	0	0	0	0	0	0	0	0
	1803	0	0	1	2	0	0	1	10	9	0	1	0	3	21	24
	1804	0	0	0	0	0	0	0	0	0	0	0	0	0	0	0
	1805	1	5	1	0	0	0	0	0	0	0	0	0	7	0	7
	1806	0	0	0	0	0	0	0	0	0	0	0	0	0	0	0
	1807	0	0	0	0	0	0	0	0	0	0	0	0	0	0	0
	1808	0	0	0	0	0	0	0	0	0	0	0	0	0	0	0
	1809	0	0	3	0	0	0	0	0	0	0	0	0	3	0	3
	1810	0	0	0	0	0	0	1	0	0	0	0	0	0	1	1
	1811	0	0	0	0	0	0	0	0	0	0	0	0	0	0	0
	1812	1	0	0	0	0	0	0	0	1	0	0	0	1	1	2
	1813	0	0	0	0	0	0	0	0	0	0	0	0	0	0	0
	1814	0	0	0	0	0	0	0	0	0	0	0	0	0	0	0
	1815	0	0	0	0	1	0	0	0	0	0	0	0	1	0	1
	1816	0	0	0	0	0	0	0	0	0	0	0	0	0	0	0
	1817	0	0	0	0	0	0	0	0	0	0	0	0	0	0	0
	1818	0	0	0	0	0	0	0	0	0	0	0	0	0	0	0
	1819	0	0	0	0	0	0	0	0	0	0	0	0	0	0	0
	1820	0	0	0	0	0	0	0	0	0	0	0	0	0	0	0
	1821	0	0	0	0	0	0	0	0	0	0	0	0	0	0	0
	1822	0	1	0	0	0	0	0	0	0	0	0	0	1	0	1
	1823	0	1	0	0	0	0	0	0	0	0	0	0	1	0	1
	1824	0	0	0	0	0	0	0	0	0	0	0	0	0	0	0
	1825	0	0	0	0	0	0	0	0	0	0	0	0	0	0	0
	1826	0	0	0	0	0	0	0	0	0	0	0	0	0	0	0
	1827	0	0	0	0	0	0	1	1	0	0	0	0	0	2	2
	1828	0	0	0	0	0	0	1	3	1	0	0	0	0	5	5
	1829	0	0	0	0	0	0	0	1	0	0	0	0	0	1	1
	1830	0	0	0	0	0	0	1	0	0	0	0	0	0	1	1
	1831	0	0	0	0	0	0	1	3	0	0	0	0	0	4	4
	1832	0	0	0	0	0	0	0	0	0	0	0	0	0	0	0
	1833	0	0	0	0	0	0	0	0	0	0	0	0	0	0	0
	1834	0	0	0	0	0	0	0	0	0	0	0	0	0	0	0
	1835	0	0	0	0	0	0	0	0	0	0	0	0	0	0	0
	1836	0	0	0	0	0	0	0	0	0	0	0	0	0	0	0
	1837	0	0	1	0	0	0	0	1	0	0	0	0	1	1	2
	1838	0	0	0	0	0	0	0	0	0	0	0	0	0	0	0
	1839	0	0	0	0	0	0	0	0	0	0	0	0	0	0	0
	1840	0	0	0	0	0	0	0	0	0	0	0	0	0	0	0
	1841	0	0	0	0	0	0	0	0	0	0	0	0	0	0	0
	1842	0	0	0	0	0	0	0	0	0	0	0	0	0	0	0
	1843	0	0	0	0	0	0	0	1	0	0	1	0	0	2	2
	1844	0	0	0	0	0	0	2	0	3	0	0	0	0	5	5
	1845	0	2	0	0	0	0	0	3	1	0	0	0	2	4	6
	1846	0	2	0	0	0	0	1	0	9	1	0	0	2	11	13
	1847	0	2	0	0	0	0	14	11	1	0	0	0	2	26	28
	1848	0	0	0	0	1	0	1	0	1	0	0	0	1	2	3
	1849	0	1	0	0	0	0	0	0	0	0	0	0	1	0	1
	1850	0	0	1	0	0	0	1	1	3	0	0	0	1	5	6
	1851	0	0	0	0	0	0	0	0	0	0	0	0	0	0	0
	1852	0	0	2	0	0	0	0	0	0	0	0	0	2	0	2
	1853	0	1	0	0	0	0	4	0	7	0	0	0	1	11	12
	1854	1	0	0	2	0	0	0	0	1	0	0	0	3	1	4
	1855	0	1	6	0	0	0	0	0	0	0	0	0	7	0	7
	1856	1	2	21	0	0	0	1	2	0	0	0	0	24	3	27
	1857	0	7	2	0	0	0	0	0	0	0	0	0	9	0	9
	1858	0	2	0	0	0	0	0	1	4	0	0	0	2	5	7
	1859	0	0	0	0	0	0	0	0	0	0	0	0	0	0	0
	1860	0	1	1	0	0	0	0	1	0	0	0	0	2	1	3
	1861	0	0	3	0	0	0	0	0	0	0	0	0	3	0	3
	1862	0	0	0	0	2	0	0	0	0	0	0	0	2	0	2
	1863	1	1	1	1	2	0	0	0	0	0	0	0	6	0	6
	1864	0	2	10	2	2	0	0	0	0	0	0	0	16	0	16
	1865	0	1	8	1	0	0	1	1	0	0	0	0	10	2	12
	1866	2	23	5	1	0	0	2	2	0	0	0	0	31	4	35
	1867	0	7	3	0	0	0	0	0	0	0	0	0	10	0	10
	1868	1	6	1	0	0	0	0	0	0	0	0	0	8	0	8
	1869	4	0	0	0	0	0	0	0	0	0	0	0	4	0	4
	1870	0	0	0	0	0	0	0	0	0	0	0	0	0	0	0
	1871	0	0	0	0	0	0	0	0	0	0	0	0	0	0	0
	1872	0	0	0	0	0	0	0	1	0	0	0	0	0	1	1
	1873	0	0	1	0	0	0	0	12	7	0	0	0	1	19	20
	1874	0	0	0	0	0	0	1	4	0	0	0	0	0	5	5
	1875	0	0	0	0	1	0	0	4	0	1	0	0	1	5	6
	1876	0	0	0	0	0	0	0	12	2	0	0	0	0	14	14
	1877	0	0	1	0	0	0	0	3	5	0	0	0	1	8	9
	1878	0	0	0	0	0	0	0	9	3	0	0	0	0	12	12
	1879	0	0	0	0	0	0	0	1	0	0	0	0	0	1	1
	1880	0	1	1	0	0	1	0	3	0	1	0	0	3	4	7
	1881	0	0	0	0	0	0	1	1	0	0	0	0	0	2	2
	1882	1	0	5	2	0	0	0	0	0	0	0	0	8	0	8
	1883	0	0	1	0	0	0	0	0	1	0	0	0	1	1	2
	1884	0	1	0	0	0	0	0	0	1	1	0	0	1	2	3
	1885	0	0	0	0	0	0	0	1	1	0	0	0	0	2	2
	1886	0	0	1	0	0	0	0	0	3	0	0	0	1	3	4
	1887	0	5	0	0	0	0	1	0	0	0	0	0	5	1	6
	1888	0	4	1	0	0	0	0	0	1	0	0	1	5	2	7
	1889	0	1	1	0	0	0	0	2	1	0	0	0	2	3	5
	1890	0	1	0	0	0	0	0	1	0	0	0	0	1	1	2
	1891	0	0	0	0	0	0	0	0	0	0	0	0	0	0	0
	1892	0	0	0	0	0	0	0	0	0	0	0	0	0	0	0
	1893	1	1	0	0	0	0	0	0	0	0	0	0	2	0	2
	1894	0	0	0	0	0	0	0	0	0	0	0	0	0	0	0
	1895	0	0	0	0	0	0	0	0	0	0	0	0	0	0	0
	1896	0	0	0	0	0	0	0	0	0	0	0	0	0	0	0
	1897	0	0	0	0	0	0	0	2	1	0	0	0	0	3	3
	1898	0	0	0	0	0	0	0	0	1	0	0	0	0	1	1
	1899	0	0	0	0	0	0	0	0	1	0	0	0	0	1	1
	1900	0	0	0	0	0	0	0	9	1	1	1	0	0	12	12
	1901	0	0	0	0	1	0	0	0	0	0	0	0	1	0	1
	1902	0	0	0	0	0	0	0	0	0	0	0	0	0	0	0
	1903	0	0	0	0	0	0	0	0	0	0	0	0	0	0	0
	1904	0	0	0	0	0	0	0	0	0	0	0	0	0	0	0
	1905	0	0	0	0	0	0	0	0	0	0	0	0	0	0	0
	1906	0	0	0	0	0	0	0	0	0	0	0	0	0	0	0
	1907	0	0	0	0	0	0	0	0	0	0	0	0	0	0	0
	1908	0	0	0	0	0	0	0	0	0	0	0	0	0	0	0
	1909	0	0	0	0	0	0	0	0	0	0	0	0	0	0	0
	1910	0	0	0	0	0	0	0	0	0	0	0	0	0	0	0
	1911	0	0	0	0	0	0	0	0	0	0	0	0	0	0	0
	1912	0	0	0	0	0	0	0	0	0	0	0	0	0	0	0
	1913	0	0	0	0	0	0	0	0	0	0	0	0	0	0	0
	1914	0	0	0	0	0	0	0	0	0	0	0	0	0	0	0
	1915	0	0	0	0	0	0	0	0	0	0	0	0	0	0	0
	1916	0	0	0	1	0	0	0	1	9	0	0	0	1	10	11
	1917	0	0	1	0	0	0	0	6	3	0	0	0	1	9	10
	1918	0	1	1	0	0	0	1	0	0	0	0	0	2	1	3
	1919	0	0	0	0	0	0	0	2	3	1	0	0	0	6	6
	1920	0	0	0	0	0	0	0	2	1	0	0	0	0	3	3
	1921	0	0	0	0	0	0	2	1	1	0	0	0	0	4	4
	1922	2	1	0	0	0	0	0	1	0	0	0	0	3	1	4
	1923	0	0	3	0	0	0	0	0	0	0	0	0	3	0	3
	1924	0	0	0	0	0	0	0	0	0	0	0	0	0	0	0
	1925	0	0	0	0	0	0	2	5	20	1	0	1	0	29	29
	1926	0	1	0	0	0	0	0	1	2	0	0	0	1	3	4
	1927	0	0	6	1	1	0	0	0	0	0	0	0	8	0	8
	1928	0	1	14	0	0	0	0	0	0	0	0	0	15	0	15
	1929	0	9	2	1	0	0	0	0	1	0	0	0	12	1	13
	1930	0	1	9	0	0	0	0	0	0	0	0	0	10	0	10
	1931	0	4	0	0	0	0	0	0	0	0	0	0	4	0	4
	1932	3	8	0	0	0	0	0	2	0	0	0	0	11	2	13
	1933	0	0	0	0	0	0	0	0	5	0	0	0	0	5	5
	1934	0	0	0	0	0	0	0	0	0	0	0	0	0	0	0
	1935	0	0	0	0	0	0	0	1	0	0	0	0	0	1	1
	1936	0	0	0	0	0	0	0	0	0	0	0	0	0	0	0
	1937	0	0	0	0	0	0	0	1	0	0	0	0	0	1	1
	1938	0	0	1	0	0	0	0	0	1	0	0	0	1	1	2
	1939	0	0	1	0	0	0	0	1	0	0	0	0	1	1	2
	1940	0	0	0	0	0	0	1	0	0	0	0	0	0	1	1
	1941	0	0	0	0	0	0	0	0	0	0	0	0	0	0	0
	1942	0	0	0	0	0	0	0	0	0	0	0	0	0	0	0
	1943	0	0	0	0	0	0	0	0	0	0	0	0	0	0	0
	1944	0	0	0	0	0	0	0	2	5	0	0	0	0	7	7
	1945	0	0	0	0	0	0	6	10	28	0	1	0	0	45	45
	1946	0	0	0	0	0	0	0	2	4	0	0	0	0	6	6
	1947	0	1	1	0	0	0	0	0	1	0	0	0	2	1	3
	1948	0	2	0	0	0	0	0	0	0	0	0	0	2	0	2
	1949	0	0	0	0	0	0	0	0	0	0	0	0	0	0	0
	1950	0	0	0	0	0	0	0	0	0	0	0	0	0	0	0
	1951	0	0	1	0	0	0	0	2	0	0	0	0	1	2	3
	1952	0	0	0	0	0	0	0	0	0	0	0	0	0	0	0
	1953	0	0	0	0	0	0	0	0	0	0	0	0	0	0	0
	1954	0	0	0	0	0	0	0	0	0	0	0	0	0	0	0
	1955	0	0	0	0	0	0	0	0	0	0	0	0	0	0	0
	1956	0	0	0	0	0	0	0	0	0	0	0	0	0	0	0
	1957	0	0	0	0	0	0	0	0	0	0	0	0	0	0	0
	1958	0	0	0	0	0	0	0	0	0	0	0	0	0	0	0
	1959	0	0	0	0	0	0	0	0	0	0	0	0	0	0	0
	1960	0	0	0	0	0	0	0	0	0	0	0	0	0	0	0
	1961	0	0	0	0	0	0	0	0	0	0	0	0	0	0	0
	1962	0	1	1	0	0	0	0	0	0	0	0	0	2	0	2
	1963	0	0	0	0	0	0	0	0	0	0	0	0	0	0	0
	1964	0	0	0	0	0	0	0	0	0	0	0	0	0	0	0
	1965	1	0	0	0	0	0	0	0	0	0	0	0	1	0	1
	1966	0	0	0	0	0	0	0	0	0	0	0	0	0	0	0
	1967	0	0	0	0	0	0	0	0	0	0	0	0	0	0	0
	1968	0	0	0	0	0	0	0	0	0	0	0	0	0	0	0
	1969	0	0	0	0	0	0	0	0	0	0	0	0	0	0	0
	1970	0	0	0	0	0	0	0	0	0	0	0	0	0	0	0
	1971	0	0	0	0	0	0	0	0	0	0	0	0	0	0	0
	1972	0	0	1	0	0	0	0	0	0	1	0	0	1	1	2
	1973	1	2	0	0	0	0	0	0	0	0	0	0	3	0	3
	1974	1	0	0	1	0	0	0	0	0	1	0	0	2	1	3
	1975	0	1	5	1	0	0	0	0	0	0	0	0	7	0	7
	1976	0	7	3	0	0	0	0	0	0	0	0	0	10	0	10
	1977	0	3	0	0	0	0	0	0	0	0	0	0	3	0	3
	1978	0	0	0	0	0	0	0	0	0	0	0	0	0	0	0
	1979	0	0	0	0	0	0	0	0	6	0	0	0	0	6	6
	1980	0	1	0	0	0	0	1	4	0	0	0	0	1	5	6
	1981	0	0	0	0	0	0	1	0	0	0	0	0	0	1	1
	1982	0	0	3	0	0	0	0	3	4	0	0	0	3	7	10
	1983	0	1	0	0	0	0	0	2	5	1	0	0	1	8	9
	1984	1	0	1	0	0	0	0	0	0	0	0	0	2	0	2
	1985	0	2	0	0	0	0	1	2	0	0	0	0	2	3	5
	1986	0	0	0	0	0	0	0	3	1	0	0	0	0	4	4
	1987	0	0	0	0	0	0	0	0	0	0	0	0	0	0	0
	1988	0	0	0	0	0	0	0	0	0	0	0	0	0	0	0
	1989	0	0	0	0	0	0	0	0	0	0	0	0	0	0	0
	1990	0	0	0	0	0	0	0	0	1	0	0	0	0	1	1
	1991	0	0	0	0	0	0	1	0	1	1	0	0	0	3	3
	1992	0	0	0	0	1	0	0	5	2	0	0	0	1	7	8
	1993	0	0	0	0	0	0	2	1	0	1	0	0	0	4	4
	1994	0	0	0	0	0	0	0	0	0	0	0	0	0	0	0
	1995	0	0	0	0	0	0	0	0	0	0	0	0	0	0	0
	1996	1	0	0	0	0	0	0	0	1	0	0	0	1	1	2
	1997	0	0	0	0	0	0	0	0	1	1	0	0	0	2	2
[truncated: 4,398 more rows]
